# Supplementary material for: De novo engineering of programmable and multi-functional biomolecular condensates for controlled biosynthesis
Source: PubMed Central journal article supplement — Nat Commun. 2024 Sep 12;15:7989. doi: 10.1038/s41467-024-52411-5 (PMC11405872; doi:10.1038/s41467-024-52411-5), 2024-09-12
Supplement: 41467_2024_52411_MOESM1_ESM.pdf [file 41467_2024_52411_MOESM1_ESM.pdf]

## Supplementary Information for

### ***De novo* engineering of programmable and multi-functional biomolecular condensates for controlled biosynthesis**

#### Table of contents

|                                                                            |    |
|----------------------------------------------------------------------------|----|
| Supplementary Table S1 Primers used in this study.....                     | 3  |
| Supplementary Table S2 Plasmids used in this study .....                   | 7  |
| Supplementary Table S3 Sequences of genetic parts used in this study ..... | 9  |
| Supplementary Table S4 Strains used in this study .....                    | 13 |
| Supplementary Fig. 1 .....                                                 | 17 |
| Supplementary Fig. 2 .....                                                 | 17 |
| Supplementary Fig. 3 .....                                                 | 18 |
| Supplementary Fig. 4 .....                                                 | 18 |
| Supplementary Fig. 5 .....                                                 | 19 |
| Supplementary Fig. 6 .....                                                 | 20 |
| Supplementary Fig. 7 .....                                                 | 20 |
| Supplementary Fig. 8 .....                                                 | 21 |
| Supplementary Fig. 9 .....                                                 | 21 |
| Supplementary Fig. 10 .....                                                | 22 |
| Supplementary Fig. 11 .....                                                | 22 |
| Supplementary Fig. 12 .....                                                | 23 |
| Supplementary Fig. 13 .....                                                | 23 |
| Supplementary Fig. 14 .....                                                | 23 |
| Supplementary Fig. 15 .....                                                | 24 |
| Supplementary Fig. 16 .....                                                | 24 |
| Supplementary Fig. 17 .....                                                | 25 |
| Supplementary Fig. 18 .....                                                | 25 |
| Supplementary Fig. 19 .....                                                | 26 |
| Supplementary Fig. 20 .....                                                | 26 |
| Supplementary Fig. 21 .....                                                | 27 |
| Supplementary Fig. 22 .....                                                | 27 |
| Supplementary Fig. 23 .....                                                | 28 |
| Supplementary Fig. 24 .....                                                | 28 |
| Supplementary Fig. 25 .....                                                | 29 |
| Supplementary Fig. 26 .....                                                | 29 |

|                             |    |
|-----------------------------|----|
| Supplementary Fig. 27 ..... | 30 |
| Supplementary Fig. 28 ..... | 30 |
| Supplementary Fig. 29 ..... | 31 |
| Supplementary Fig. 30 ..... | 31 |
| Supplementary Fig. 31 ..... | 32 |
| Supplementary Fig. 32 ..... | 32 |
| Supplementary Fig. 33 ..... | 32 |

**Supplementary Table S1 Primers used in this study**

| Primer      | Sequence                                              |
|-------------|-------------------------------------------------------|
| HPHT-F1     | AGGTTTATTTTATGAGCAAAGGAGAAGAACTT                      |
| HPHT-R1     | TTCATTCTAGAGCGCAACGCAATTAATGTGAGTTA                   |
| PGRAC-R     | AGTGAAAAGTTCTTCTCCTTTGCTCATAAAATAAACCTCCTTTCTTTTACTTA |
| PGRAC-F     | ACATTAATTGCGTTGCGCTCTAGAATGAAAGGGGATTTTATGCT          |
| HPHT-F2     | GGCAGCCCCGACGGCGGATATTAAGTGCAGGTCGACGTCCC             |
| HPHT-R2     | CTTGCCCTTTTCGACATAAAATAAACCTCCTTTCTTTTACTTAC          |
| SIDP1-F1    | AGAAAGGAGGTTTATTTTATGTGCGAAAGGGCCAAGGGG               |
| SIDP1-R1    | GACCTGCAGTTAATATCCGCCGTCGGGGCTGCCGTA                  |
| PHT-TY-YZ-F | ACGAAACAGCCTCTACAAAT                                  |
| SIDP1-YZ-R  | CGGGTGAACCATATCCTCTCC                                 |
| HPHT-F3     | CGGTGGATCAGGTGGAGGCGGTTCTATGTGCGAAAGGGCCAAGGGG        |
| HPHT-R3     | GCATACTGTTCCAGCATAAAATAAACCTCCTTTCTTTTACTT            |
| SIDP1-RIA-F | ATGCTGGAACAGTATGCAATCAGCTGGCAGATCAGATTATCAAAGAAGCA    |
| SIDP1-RIA-R | ACCGCCTCCACCTGATCCACCGCCACCTTCGGTTGCTTCTTTGATAATCT    |
| RIAD-YZ-F   | CTGGCAGATCAGATTATCAAAGA                               |
| HPHT-F4     | ATCAGGCGGAGGCGGTTCCATGAGCAAAGGAGAAGAACTTTT            |
| HPHT-R4     | CCCTTTTCGACATAAAATAAACCTCCTTTCTTTTACTTAC              |
| SIDP1-GFP-F | TAAAAGAAAGGAGGTTTATTTTATGTGCGAAAGGGCCAAGGGG           |
| SIDP1-GFP-R | CGCCTGATCCACCGCCACCATAGCCGCCGTCGGGGCTGCCGTA           |
| HPHT-F7     | TGCTGATGCCATAGAACCGCCTCCACCTGAT                       |
| HPHT-R7     | ATCGCGGCGGAGGCGGCTAACTGCAGGTCGACGTCCCCG               |
| FUSN-F      | ATCAGGTGGAGGCGGTTCTATGGCATCAGCATCAAATGA               |
| FUSN-R      | CGACCTGCAGTTAGCCGCCTCCGCCGCGATCT                      |
| FUSN-YZ-R   | TGTGAGTATGAGCCGCTTT                                   |
| HPHT-F8     | ACGGAGGGGATGGTTAACTGCAGGTCGACGTCCCC                   |
| HPHT-R8     | TATTTGATTGATTTGATTCCATGCTTCCACCGCCACCTTCG             |
| RGG-F1      | TGGCGGTGGAAGCATGGAATCAAATCAATCAAATAATGG               |
| RGG-R1      | GATTGGTTAGATTCCATGCCATCGCCGCCATTATC                   |
| RGG-F2      | ATGGCGGCGATGGCATGGAATCTAACCAATCAAACAATGG              |
| RGG-R2      | TCGATTGATTGCTCTCCATCAGTTTACCGTCGCCGCCATTGTC           |
| RGG-F3      | GCGACGGTAACTGATGGAGAGCAATCAATCGAATAAT                 |
| RGG-YZ-R    | CCGCGTGAAAAGTTTGATGAT                                 |
| HPHT-F9     | GTACGGCGGCTATTAAGTGCAGGTCGACGTCC                      |

|             |                                                 |
|-------------|-------------------------------------------------|
| HPHT-R9     | CCGCCTCGTGGCCCTTTCGACATAGAACCGCCTCCACCTG        |
| SIDP2-F     | GGTGGAGGCGGTTCTATGTGCGAAAGGGCCACGAGGCGGA        |
| SIDP2-R     | CCTGCAGTTAATAGCCGCCGTACGGGGAG                   |
| SIDP2-YZ-R  | TCGCCGCCCCGCCATAA                               |
| SIDP4-F     | ATGTGCGAAAGGGCCAGGTTATCCTTCAGAT                 |
| SIDP4-R     | GCCACGGCCATCAGATGGGTAA                          |
| SIDP4-YZ-R  | GGATATCCCCCTCTACCATCG                           |
| HPHT-F11    | GGAGGTGAAATGTACACATGCTGGAACAGTATGCAA            |
| HPHT-R11    | ACATACCACCTATCAACTAGTATAAAAAACGCCCG             |
| Pveg-F      | TTATTAACGTTGATATAATTTAAATTTTATTTGACAAAA         |
| Pveg-R      | ACCCCCTACCCCAAAAAATAAACCTCCTTTCTTTTACTTACCCT    |
| Pveg-YZ-R   | TGACAAAAATGGGCTCGTG                             |
| HPHT-F12    | CAATAAATGTAGTGATAGCGGTACCAAAGGAGGTGAAATGTACACAT |
| HPHT-R12    | AGAAACATTTGGCTAAACTAGTATAAAAAACGCCCGG           |
| VIOE-F      | ATGAAAACCGGGAACCGC                              |
| VIOE-R      | CTAACGCTTGGCGGCGAAGA                            |
| VIOE-YZ-R   | ACCATCCTCAGCGGCGTA                              |
| VIOC-F      | ATGAAAAGAGCAATCATAGTCGGA                        |
| VIOC-R      | TCAGTTGACCCTCCCTATCT                            |
| VIOC-YZ-R   | ACCTTGCGCAGCTCGGTG                              |
| VIOA-F      | ATGAAGCATTCTCCGATATCT                           |
| VIOA-R      | TCACGCGGCGATGCGCTG                              |
| VIOA-YZ-R   | TGTGACGATCAGCACCT                               |
| VIOB-F      | ATGAGCATTCTGGATTTTCCACG                         |
| VIOB-R      | TCAGGCCTCTCTCGAAAGC                             |
| VIOB-YZ-R   | ATCAGCTCGTACACGCC                               |
| PspovG-YZ-F | CTTTTTTATTTACCTTATGCCCGAAA                      |
| Gmd-F       | ATGTCAAAAGTCGCTCTCA                             |
| Gmd-R       | TGAACCAGAACCTGAACCTGACTCCAGCGCGATCGCCA          |
| Gmd-YZ-R    | AAATCTTCCGGCTGTTCC                              |
| WcaG-F      | ATGAGTAAACAACGAGTTTTTATTGC                      |
| WcaG-R      | CCCCGAAAGCGGTCTTGAT                             |
| WcaG-YZ-R   | GCTGCCCCATACCACCAC                              |
| ManB-F      | ATGCTAACTTGCTTTAAAGCTTAT                        |
| ManB-R      | CTTGTTCACTCAAGGATAAGT                           |

|            |                                                |
|------------|------------------------------------------------|
| ManB-YZ-R  | TTGCGCATACGTTCTTTAATAAAGG                      |
| ManC-F     | ATGAGCTCACCTCTTATTCCG                          |
| ManC-R     | ATCTTCAAATCGAAGGATATCATC                       |
| ManC-YZ-R  | CCTACATCATTCCAACCGATA                          |
| FutC-F     | ATGGCATTTAAGGTTGTTTCAGATTT                     |
| FutC-R     | TGCATTATATTTTTGTGATTTAACTTCAA                  |
| FutC-YZ-R  | TTTGATAATCAATGCCAGTTGG                         |
| Hp43NMK-F1 | GGAAAAAGAAGAAGCCAAATAATAATGATGAAAGCTTGCGTAAT   |
| Hp43NMK-R1 | GACTGGAAAGCGGGCAGTGAGCCATTACAGCTTTGGCAAAAAA    |
| Pgrac-F3   | CTGTAATGGCTCACTGCCCGCTTTCCAGT                  |
| Pgrac-R3   | GATCAGTTCAGAAACCATAAAATAAACCTCCTTTCTTTTACTTACC |
| mKate-F    | GAAAGGAGGTTTTATTTTATGGTTTCTGAACTGATCAAAGA      |
| mKate-R    | TACCGCTACCTGAACCACGGTGACCCAGTTTAGA             |
| RIDD-R     | AGCTTTCATCATTATTATTTGGCTTCTTCTTTTCCAG          |
| RIDD-F     | ACAGTTCACATTCACGCAGGCTACCGCTACCTGAACCAC        |
| RIDD-YZ-R  | GAAATGCCATCGGACGTT                             |
| Hp43NMK-F2 | GATAGCGGTACCCTCGAATGGTTTCTGAACTGATCAAAGA       |
| Hp43NMK-R2 | TGTTACCCCTATAAGTTAGGCCATTACAGCTTTGGCAAAAAA     |
| xylA-F     | CCAAAGCTGTAATGGCCTAACTTATAGGGGTAACACTTAAAAAA   |
| xylA-R     | GATCAGTTCAGAAACCATTGAGGGTACCGCTATCAC           |
| XylA-YZ-R  | AACCACTCCTTTGTTTATCCAC                         |
| HPB-Trs-F1 | GATCCGTAAACGTCTGTAAATTATGGAAAGGCGTGCC          |
| HPB-Trs-R1 | GTGTACATTCCTCTCTTACCTATAATGGTACCGCTATCACTTT    |
| Trs-F1     | AGAGAGGAATGTACACATGGATGAATTTGAAATGATTAACGC     |
| Trs-R1     | GCCTTTCCATAATTTACAGACGTTTACGGATCGG             |
| Trs-CX-R   | TGTTATAGTCGCCGATTTTGC                          |
| HP43NMK-R1 | TGGAAAGCGGGCAGTGAGCCATTACAGCTTTGGCAA           |
| HP43NMK-F1 | CACACCACCACCACCACCTAATGATGAAAGCTTGCGT          |
| PGRAC-F1   | AGCTGTAATGGCTCACTGCCCGCTTTCCAG                 |
| PGRAC-R1   | TAAATGCCATAAAATAAACCTCCTTTCTTTTACTTACCC        |
| CX-F2-TY   | CCCAGTTGGCAGCCAATG                             |
| HPB-Trs-F2 | CGAGAGATAAACTGTAAATTATGGAAAGGCGTGCCTGACAAGG    |
| HPB-Trs-R2 | ATGGACCCTGAACCAGAGCCTGATCCCAGACGTTTACGG        |
| F2-F1      | CAGGCTCTGGTTCAGGGTCCATGGCACACGTTCCGGGGT        |
| F2-R1      | CTTTCCATAATTTACAGTTTATCTCTCGGTGTCCGT           |

|            |                                                    |
|------------|----------------------------------------------------|
| F2-YZ-R    | TTCCAGAAAAGTATTTGCCCTT                             |
| HPB-Trs-F3 | CGAGAGATAAACTGTAAATTATGGAAAGGCGTGCCTGACAAGG        |
| HPB-Trs-R3 | GCGTTAATGGCATGTGTACATTCCTCTCTTACCTATA              |
| DIV-TY-F1  | TAGGTAAGAGAGGAATGTACACATGCCATTAACGCCAAATGA         |
| DIV-TY-R1  | AACCAGAGCCTGATCCAGACCCAAAGTGTCCGATTCTTTCATCAA      |
| Trs-F2     | GGGTCTGGATCAGGCTCTGGTTCAATGGATGAATTTGAAATGATTAAACG |
| DIV-YZ-F   | AGACGTTTACAAAAAGTTTTTCGC                           |
| DIVMUT-F1  | AAAAAGTTTTTGC GGATATGATGAAGATGAAGTAAATGAA          |
| DIVMUT-R1  | ATCATATCCGCAAAAAC TTTTTGTAAACGTCTTG                |
| HPB-Trs-F4 | TACGGAGATGGCGGCTATATGGCACACGTTCCGGGG               |
| HPB-Trs-R4 | TTGGCCCTTTTCGACATGGACCCTGAACCAGAGCC                |
| SIDP3-F    | TCAGGTCCATGTGCAAAGGGCCAAGGGGAAGTC                  |
| SIDP3-R    | CGTGTGCCATATAGCCGCCATCTCCGTATGGA                   |
| SIDP3-YZ-R | CCTGCCATCCCCGTAAGG                                 |
| HPB-Trs-F5 | CCAGATGGTAGGGGCTACGGGATGGCACACGTTCCGGGGGT          |
| HPB-Trs-R5 | CCATAGCCCCTTGGCCCTTTTCGACATGGACCCTGAACCAGAG        |
| SIDP1-F11  | CAGGGTCCATGTGCAAAGGGCCAAGGGGCTATG                  |
| SIDP1-R11  | GAACGTGTGCCATCCCGTAGCCCCTACCATC                    |
| SIDP1-YZ-R | CCGTCCGGAGAGCCGTAA                                 |
| HPB-Trs-F6 | TAGGGGCTACGGGTAAATTATGGAAAGGCGTGCC                 |
| SIDP1-R21  | GGCACGCCTTTCCATAATTTACCCGTAGCCCCTACCATC            |
| HPADK-R1   | TGAGCTCTACAAATAACGCGCGAAAAACGCGAGC                 |
| HPADK-F1   | TGGGTCAACGTTAACTGCAGGTGACGTTCCCGGG                 |
| mKate-F1   | AAGGAGGTTTATTTTATGGTTTAGGAACTGATCAAAGA             |
| mKate-R1   | TCGACCTGCAGTTAACGGTGACCCAGTTTAGACG                 |
| PVEG-F1    | ACCACCTATCAATTTTATGCTTCAGAACGCTCGGTTGC             |
| PVEG-R1    | TCAGTTCCTAAACCATAAAAATAAACCTCCTTTCTT               |
| P43-R1     | TCTGAAGCATAAAATTGATAGGTGGTATGTTTTTCGC              |
| P43-F1     | CTTCTCCCTAGCTCATGTGTACATTTACCTCCTTTGG              |
| GFP-F1     | GCGTTTTTCGCGCGTTATTTGTAGAGCTCATCCATGCCA            |
| GFP-R1     | TGAAATGTACACATGAGCTAGGGAGAAGAAC                    |
| GFP-YZ-F   | AAGATATAGTGC GTTCCTGTAC                            |
| mKate-YZ-F | TTTTCAAACAGTCTTTCCCGGA                             |
| HPADK-R2   | CGGGTTCATTAGATCCGCGCGAAAAACGCGAGCG                 |
| HPADK-F2   | AGGTACCTTAGGATCTCGACGAGCTCCGTCTTTAT                |

|           |                                                 |
|-----------|-------------------------------------------------|
| RBTA-F1   | TTTTCGCGCGGATCTAATGAACCCGGAATACTG               |
| RBTA-R1   | AGCTCGTCGAGATCCTAAGGTACCTAATTGCCTA              |
| HPADK-R3  | AAGTACTTACCCCAAAAAAACTGCAGGTCGACAAAAACG         |
| HPADK-F3  | CAGCTTTGTTCCCCGACGAGCTCCGTCTTTATTT              |
| RBTA-F2   | CGACCTGCAGTTTTTTTTGGGGTAAGTACTTCAGCTTTGTT       |
| RBTA-R2   | CTCGTCGGGGAACAAAGCTGAAGTACTT                    |
| RBTA-YZ-F | TTGGGGTAAGTACTTCAGCT                            |
| HPADK-R4  | GCATGGACGAACTCTATAAATAATAAAGACGGAGCTCGTCGGGGAAC |
| HPADK-F4  | TCACCTTTCTAAACCATGTGTACATTTACCTCCTTTG           |
| CFP-F1    | CTCCGTCTTTATTATTTATAGAGTTCGTCCATGCC             |
| CFP-R1    | GTACACATGGTTTAGAAAGGTGAAGAATT                   |
| CFP-YZ-F  | TTCAACTCAATCCGGTTTAC                            |
| HPHT-D-F1 | CGGACACTTTATGTCGAAAGGGCCAAGGGGCTATGGCTCTCCGGA   |
| HPHT-D-R1 | CGTTAATGGCATAAAATAAACCTCCTTTCTTTTACTT           |
| DIV-TY-F2 | AAGGAGGTTTATTTTATGCCATTAACGCCAAATGAT            |
| DIV-TY-R2 | GGCCCTTTGACATAAAGTGTCCGATTCTTTCATC              |
| GNA1-F    | ATGAGCCATATCTTCGACGCA                           |
| GNA1-F    | TTAAAAGCGCTGGGTCATA                             |
| GNA1-YZ-R | TAAAGATTTGCCAAGTGACACCA                         |
| AGEM-TY-F | TTATTTCTCCGAGATGTCAGAAAGG                       |
| AGEM-TY-R | ATGGACTTTAAGAAGTTAGCGGA                         |
| AGEM-YZ-R | CGAAGGTACGCTTAGCGAT                             |
| AGE-TY-F  | ATGGATTTCAAGAAGCTGGC                            |
| AGE-TY-R  | TTATTTTTGCTGATATCACTAAGAACC                     |
| AGE-YZ-R  | CTTTTCAATTAAGTCCGGACGG                          |

**Supplementary Table S2 Plasmids used in this study**

| Plasmid       | Characteristics                                                                                                                                                                                              | Ref.      |
|---------------|--------------------------------------------------------------------------------------------------------------------------------------------------------------------------------------------------------------|-----------|
| pHTa0         | ColE1 Amp <sup>r</sup> , Cm <sup>r</sup> , <i>E. coli-B. subtilis</i> shuttle vector, $\Delta P_{grac}:: gfp$                                                                                                | Lab stock |
| pP43-NmCherry | ColE1 Amp <sup>r</sup> , RepB Kan <sup>r</sup> , <i>E. coli-B. subtilis</i> shuttle vector, P <sub>43-</sub> mCherry, an N-terminal coding sequence of abrB was added into mCherry to improve its expression | Lab stock |
| pADK15-sfGFP  | p15A Kan <sup>r</sup> , Rep60 Kan <sup>r</sup> , <i>E. coli-B. subtilis</i> shuttle vector, P <sub>veg-gfp</sub>                                                                                             | Lab stock |
| pHT28a        | Kan <sup>r</sup> , <i>E. coli</i> vector for expression of N-terminally 6xHis-tagged                                                                                                                         | Lab stock |

|                                                  | proteins with a thrombin site                                                                                                                                        |           |
|--------------------------------------------------|----------------------------------------------------------------------------------------------------------------------------------------------------------------------|-----------|
| pHT-XCR6                                         | pHT01 derivate, <i>xyIR-P<sub>xyIA</sub>-FnCas12a-NgAgo</i>                                                                                                          | Lab stock |
| pcrF11                                           | ColE1 Kan <sup>r</sup> , Kan <sup>r</sup> , <i>E. coli-B. subtilis</i> shuttle vector, expressing crRNA<br>by <i>P<sub>veg</sub></i>                                 | Lab stock |
| pBUA-Trs                                         | pHT01 derivate, OMeY-aaRS gene cloned under<br>the control of <i>P<sub>43</sub></i> promoter and mutant tRNA under the<br>control of <i>P<sub>224</sub></i> promoter | Lab stock |
| pHT28a-1                                         | pHT28a derivate, <i>P<sub>T7</sub>-SIDP1-gfp</i>                                                                                                                     | This work |
| pHT28a-2                                         | pHT28a derivate, <i>P<sub>T7</sub>-SIDP2-gfp</i>                                                                                                                     | This work |
| pHT28a-3                                         | pHT28a derivate, <i>P<sub>T7</sub>-SIDP3-gfp</i>                                                                                                                     | This work |
| pHT28a-4                                         | pHT28a derivate, <i>P<sub>T7</sub>-SIDP4-gfp</i>                                                                                                                     | This work |
| pHT28a-5                                         | pHT28a derivate, <i>P<sub>T7</sub>-SIDP5-gfp</i>                                                                                                                     | This work |
| pHT28a-6                                         | pHT28a derivate, <i>P<sub>T7</sub>-SIDP6-gfp</i>                                                                                                                     | This work |
| pHT28a-7                                         | pHT28a derivate, <i>P<sub>T7</sub>-SIDP7-gfp</i>                                                                                                                     | This work |
| pHT28a-8                                         | pHT28a derivate, <i>P<sub>T7</sub>-SIDP8-gfp</i>                                                                                                                     | This work |
| pHT28a-9                                         | pHT28a derivate, <i>P<sub>T7</sub>-SIDP9-gfp</i>                                                                                                                     | This work |
| pHT28a-10                                        | pHT28a derivate, <i>P<sub>T7</sub>-SIDP10-gfp</i>                                                                                                                    | This work |
| pHT28a-11                                        | pHT28a derivate, <i>P<sub>T7</sub>-SIDP11-gfp</i>                                                                                                                    | This work |
| pHT28a-12                                        | pHT28a derivate, <i>P<sub>T7</sub>-SIDP12-gfp</i>                                                                                                                    | This work |
| pHT28a-13                                        | pHT28a derivate, <i>P<sub>T7</sub>-SIDP13-gfp</i>                                                                                                                    | This work |
| pHT28a-14                                        | pHT28a derivate, <i>P<sub>T7</sub>-SIDP1</i>                                                                                                                         | This work |
| pHT- <i>P<sub>grac</sub></i> -GFP                | pHTa0 derivate, <i>P<sub>grac100-gfp</sub></i>                                                                                                                       | This work |
| pHT- <i>P<sub>grac</sub></i> -SIDP1-GFP          | pHT- <i>P<sub>grac</sub></i> -GFP derivate, <i>P<sub>grac100-SIDP1-gfp</sub></i>                                                                                     | This work |
| pHT- <i>P<sub>grac</sub></i> -RIAD-SIDP1-<br>GFP | pHT- <i>P<sub>grac</sub></i> -GFP derivate, <i>P<sub>grac100-RIAD-SIDP1-gfp</sub></i>                                                                                | This work |
| pHT-SIDP1                                        | pHT- <i>P<sub>grac</sub></i> -GFP derivate, <i>P<sub>grac100-RIAD-SIDP1</sub></i>                                                                                    | This work |
| pHT-SIDP2                                        | pHT- <i>P<sub>grac</sub></i> -GFP derivate, <i>P<sub>grac100-RIAD-SIDP2</sub></i>                                                                                    | This work |
| pHT-FUSN                                         | pHT- <i>P<sub>grac</sub></i> -GFP derivate, <i>P<sub>grac100-RIAD-fusn</sub></i>                                                                                     | This work |
| pHT-3RGG                                         | pHT- <i>P<sub>grac</sub></i> -GFP derivate, <i>P<sub>grac100-RIAD-3rgg</sub></i>                                                                                     | This work |
| pHT-SIDP4                                        | pHT- <i>P<sub>grac</sub></i> -GFP derivate, <i>P<sub>grac100-RIAD-SIDP4</sub></i>                                                                                    | This work |
| p43NMK- <i>P<sub>grac</sub></i> -mKate-<br>RIDD  | pP43-NmCherry derivate, <i>P<sub>grac100-mKate-RIDD</sub></i>                                                                                                        | This work |
| p43NMK- <i>P<sub>xyIA</sub></i> -mKate-<br>RIDD  | pP43-NmCherry derivate, <i>P<sub>xyIA-mKate-RIDD</sub></i>                                                                                                           | This work |
| pBUA-Trs-F2                                      | pBUA-Trs derivate, <i>P<sub>43-TyrRS-F2-Ter-P<sub>224</sub>-tRNA</sub></i>                                                                                           | This work |



|                                               |                                                                                                                |           |
|-----------------------------------------------|----------------------------------------------------------------------------------------------------------------|-----------|
| pBUA-div-Trs-F2                               | pBUA-Trs derivate, P <sub>43</sub> -div-TyrRS-F2-Ter-P <sub>224</sub> -tRNA                                    | This work |
| pBUA-divmut-Trs-F2                            | pBUA-Trs derivate, P <sub>43</sub> -divmut-TyrRS-F2-Ter-P <sub>224</sub> -tRNA                                 | This work |
| pBUA-Trs-SIDP3-F2                             | pBUA-Trs derivate, P <sub>43</sub> -TyrRS-SIDP3-F2-Ter-P <sub>224</sub> -tRNA                                  | This work |
| pBUA-Trs-SIDP1-F2                             | pBUA-Trs derivate, P <sub>43</sub> -TyrRS-SIDP1-F2-Ter-P <sub>224</sub> -tRNA                                  | This work |
| pBUA-div-Trs-SIDP1-F2                         | pBUA-Trs derivate, P <sub>43</sub> -div-TyrRS-SIDP1-F2-Ter-P <sub>224</sub> -tRNA                              | This work |
| pBUA-Trs-SIDP1                                | pBUA-Trs derivate, P <sub>43</sub> -TyrRS-SIDP1-Ter-P <sub>224</sub> -tRNA                                     | This work |
| pBUA-RIAD-Trs-SIDP1-F2                        | pBUA-Trs derivate, P <sub>43</sub> -RIAD-TyrRS-SIDP1-F2-Ter-P <sub>224</sub> -tRNA                             | This work |
| pBUA-RIAD-Trs-F2                              | pBUA-Trs derivate, P <sub>43</sub> -RIAD-TyrRS-F2-Ter-P <sub>224</sub> -tRNA                                   | This work |
| pADK-1                                        | pADK15-sfGFP derivate, P <sub>43</sub> -GFP <sup>3TAG</sup> -6RTBA-Ter-P <sub>veg</sub> -mKate <sup>3TAG</sup> | This work |
| pADK-2                                        | pADK15-sfGFP derivate, P <sub>43</sub> -CFP <sup>3TAG</sup> -6RTBA-Ter-P <sub>veg</sub> -mKate <sup>3TAG</sup> | This work |
| pADK-3                                        | pADK15-sfGFP derivate, P <sub>43</sub> -GFP <sup>3TAG</sup> -RTBA-Ter-P <sub>veg</sub> -mKate <sup>3TAG</sup>  | This work |
| pADK-4                                        | pADK15-sfGFP derivate, P <sub>43</sub> -rpsC-GFP-Ter-P <sub>veg</sub> -manA-mKate <sup>3TAG</sup> -6RTBA       | This work |
| pHT-P <sub>grac</sub> -div-SIDP1-GFP          | pHT-P <sub>grac</sub> -SIDP1-GFP derivate, P <sub>grac100</sub> -div-SIDP1-gfp                                 | This work |
| pHT-P <sub>grac</sub> -divmut-SIDP1-GFP       | pHT-P <sub>grac</sub> -SIDP1-GFP derivate, P <sub>grac100</sub> -divmut-SIDP1-gfp                              | This work |
| p43NMK-P <sub>grac</sub> -AGE                 | p43NMK-P <sub>grac</sub> -mKate-RIDD derivate, P <sub>grac100</sub> -age-6xHis                                 | This work |
| p43NMK-P <sub>grac</sub> -AGE <sup>OMeY</sup> | p43NMK-P <sub>grac</sub> -mKate-RIDD derivate, P <sub>grac100</sub> -age <sup>OMeY</sup> -6xHis                | This work |

**Supplementary Table S3 Sequences of genetic parts used in this study**

| Name   | Sequence                            |
|--------|-------------------------------------|
| SIDP1  | MSKGP-(RGYGSPDG) <sub>20</sub> -GY  |
| SIDP2  | MSKGP-(RGGDSPYG) <sub>20</sub> -GY  |
| SIDP3  | MSKGP-(RGSPYGDG) <sub>20</sub> -GY  |
| SIDP4  | MSKGP-(GYPSDGRG) <sub>20</sub> -GY  |
| SIDP5  | MSKGP-(DGRGSPYG) <sub>20</sub> -GY  |
| SIDP6  | MSKGP-(RGAGSPDG) <sub>20</sub> -GY  |
| SIDP7  | MSKGP-(RGTGSPDG) <sub>20</sub> -GY  |
| SIDP8  | MSKGP-(RGYGSPDGY) <sub>20</sub> -GY |
| SIDP9  | MSKGP-(GYGSPDG) <sub>20</sub> -GY   |
| SIDP10 | MSKGP-(KGYGSPDG) <sub>20</sub> -GY  |

SIDP11 MSKGP-(EGYGSPDG)<sub>20</sub>-GY  
 SIDP12 MSKGP-(AGYGSPDG)<sub>20</sub>-GY  
 SIDP13 MSKGP-(TGYGSPDG)<sub>20</sub>-GY  
 SIDP1<sup>TAG</sup> MSKGP-(RGYGSPDG)<sub>10</sub>-TAG-(RGYGSPDG)<sub>10</sub>-GY  
 RBS1 TACCTCGTTAAAAGGATACAATTAA  
 RBS2 CATAAAGGGGGAAAGGGGTATTAGA  
 RBS3 GCGACGAAACGGAGAGAGGTATTTTA  
 RIAD ATGCTGGAACAGTATGCAAATCAGCTGGCAGATCAGATTATCAAAGAAGCAACCGA  
 A  
 CTGCGTGAATGTGAACTGTATGTTTCAGAAACATAATATTCAGGCCCTGCTGAAAGA  
 RIDD TAGCATTGTTTCAGCTGTGTACCGCACGTCCGGAACGTCCGATGGCATTCTGCGC  
 GAATATTTTGAACGTCTGGAAAAAGAAGAAGCCAAA  
 ATGGCATCAGCATCAAATGATTATACACAACAAGCAACACAAAGCTATGGCGCATA  
 TCCGACACAACCGGGCCAAGGATACTCACAACAATCATCACAACTTATGGACAAC  
 AATCATATAGCGGCTATTCACAATCAACAGATAACAAGCGGCTATGGCCAATCAAGC  
 TACTCAAGCTACGGCCAATCACAAAATACGGGCTATGGCACACAATCAACACCGCA  
 AGGATACGGCTCAACGGGCGGCTATGGCTCAAGCCAAAGCAGCCAATCAAGCTAT  
 FUSN GGCCAACAATCATCATATCCGGGCTATGGACAACAACCGGCACCGTCATCAACAA  
 GCGGCAGCTATGGCTCATCATCACAAGCAGCTCATATGGCCAACCGCAAAGCGG  
 CTCATACTCACAGCAGCCTTCATATGGCGGCCAACAGCAAAGCTACGGACAACAG  
 CAGAGCTATAACCCGCCGCAAGGCTACGGACAACAAAATCAGTATAATTCAAGCA  
 GCGGCGGAGGCGGAGGCGGCGGAGGAGGCGGAAATTATGGCCAAGATCAATCAT  
 CAATGTCAAGCGGCGGAGGCAGCGGCGGCGGCTATGGCAATCAAGATCAAAGCG  
 GAGGCGGAGGAAGCGGAGGCTACGGACAACAAGATCGCGGCGGAGGCGGC\*  
 ATGGAATCAAATCAATCAAATAATGGCGGAAGCGGCAACGCGGCACTGAATCGCG  
 GCGGCAGATACGTTCCGCCGCATCTGAGAGGCGGCGACGCGGAGCGGCAGCG  
 GCAGCATCAGCGGCGGCGATGATCGCAGAGGCGGCGCGGCGGAGGCGGCTA  
 TAGAAGAGGCGGAGGCAATAGCGGCGGAGGAGGAGGAGGCGGATATGATAGAG  
 GCTACAATGATAATAGAGATGATAGAGATAACAGAGGCGGCAGCGGCGGCTATGG  
 RGG CAGAGATAGAAATTATGAAGATAGAGGCTATAATGGCGGAGGCGGAGGCGGAGG  
 AAACAGAGGCTACAATAACAACAGAGGAGGAGGCGGAGGCGGCTATAATAGACAA  
 GATAGAGGCGATGGCGGCTCATCAAATTTTTCAAGAGGAGGCTACAACAATCGCG  
 ATGAAGGCTCAGATAATAGAGGAAGCGGCAGATCATATAATAATGATAGAAGAGAT  
 AATGGCGGCGATGGC\*  
 GNA1 ATGAGCCATATCTTCGACGCATCTGTACTGGCTCCACATATTCCTAGTAACCTTCCT

GATAATTTCAAGGTGAGACCACTGGCAAAGGATGATTTTTCGAAGGGATATGTCGA  
CCTGCTGTACAATTGACGTGAGTTGGAAACCTTGACCAAGAAGCATTGAGAAAC  
GATTTGAGGCGATGAGAACAAGCGTACCGAATTATCACATCGTAGTAATTGAGGAT  
TCCAACAGCCAGAAAGTGGTGGCGTCTGCTAGTTTGGTTGTTGAAATGAAATTCAT  
TCATGGGGCCGGATCAAGGGGTCTGTTGAAGATGTTGTCGTCGATACAGAAATG  
CGCCGGCAAAAATTAGGTGCCGTGCTTTTAAAACTTTGGTGTCACTTGGCAAATC  
TTTAGGCGTCTACAAAATAAGCCTCGAATGCGTCCCGGAATTACTCCCGTTCTATT  
CCCAATTTGGCTTTCAGGATGACTGTAATTTTATGACCCAGCGCTTT\*

AGE

ATGGATTTCAAGAAGCTGGCTGAACAATATAAGGCTGAATTAATGGAGAATGTCTT  
GCCCTTCTGGCTTTCAGCACTCGCAGGACAAGGAATTTGGTGGTTATTTACAGTGT  
TAAAGCGCAACGGCGAGGTGTTTGATACAGACAAATTTATCTGGTTGCAAGGTCGT  
GAAGTTTGGATGTTCCGATGTTGTACAACAAGGTGGAGAAACGCCAGGAGTGGT  
TGGACTGCGCAATTCAAGGTGGAGAATTTTTAAAAAGTACGGGCACGATGGGAG  
TTACAACCTGGTACTTCTCGCTGGACCGTGAGGGCCATCCTCTGGTGGAAACCCTAC  
AATATTTTTTCTTATACCTTTCGACAATGGCGTTTGGTCAAGTTGCTTTAGCCACT  
GGCAACCAAGAGTATGCTGATATTGCGAAACGTACTTTTGACATCGTCTTAAGTAA  
GGTAAATAACCCAAAAGGAAAGTGAACAAGTTACACCCCGAACTCGTGACCTG  
AAAGGGTTCGCGCTTCCGATGATCTTGTGTAAGTGGCCCTGGAAATCGAGCACTT  
GTTGGATGAAGACTTCCTTGTGAAGACTATGGATACTTGCATTCACGAAGTAATGG  
ACGTGTTTTACCGCCCCGAGCTTGGAGGACTGATTGTGGAGAACGTGCTTGCTGA  
TGGCTCATTAAGTGATAGTTTCGAGGGCCGCCAGGTAACCCCTGGGCACGCAATC  
GAGGCAATGTGGTTCATTATGGACCTGGGGAAACGTCTGAACCGTCCGGACTTAA  
TTGAAAAGGCGAAGAACATCACGCTGACTATGCTTAACTACGGATGGGATAAACAA  
TATGGAGGTATCTACTATTTTATGACCGCTTAGATAACCCCCACAACAGCTTGA  
GTGGGATCAGAACTTTGGTGGGTGCACATTGAGACTCTGATTTTACTTAAAGG  
GATATCACTTGACAGGCGATCGTCAGTGCCTGGAGTGGTTTGAGAAAGTGCATGA  
TTATGTTTGGTTCGATTTTAAAGACCAAGAATACCCAGAATGGTACGGATACCTGA  
ACCGCCGTGGCGAGGTCTTACTTCCGCTTAAAGGGCGGGAAATGGAAAGGATGTTT  
CCACGTCCCACGTGGATTGTACCAATGCTGGAAGGTTCTTAGTGATATCAGCGAAA  
AA\*

AGE<sup>OMeY</sup>

ATGGACTTTAAGAAGTTAGCGGAACAGTATAAAGCAGAGCTGCTGGAAAACGTGCT  
TCCATTTTGGTTGCAACACTCGCAGGATAAGGAGTTTGGGGGCTACTTTACGTGCT  
TGAAACGTGATGGAGAAGTCTTTGATACTGACAAGTTTATTTGGTTGCAGGGTCGT  
CAAGTCTGGATGTTTGAATGTTATATAATAAAGTGGAGAAGCGCCAAGAGTGGTT  
AGACTGTGCGATCCAAGGAGGAGAGTTTTTGAAGAAATACGGTCATGACGGTTCC

TATAACTGGTATTTCTCATTGGACCGTGAGGGCCATCCCTTAGTGGAGCCATACAA  
TATTTTTTCTTACACCTTTGCTACGATGGCATTCCGGTCAGTTGAGTCTTGCTACAGG  
AAATCAAGAATACGCGGACATCGCTAAGCGTACCTTCGACATCGTATTATCTAAAG  
TAAACAATCCGAAAGGTAAATGGAATAAGTTGCATCCAGGCACACGCGACCTGAAA  
AATTCGCTTTGCCTATGATCCTGTGTAATCTTGCCCTGGAGATTGAACACTTGCTT  
GACGAGGATTTTCTGGTCAAAACGATGGACACCTGTATCCACGAAGTGATGGACG  
TATTTTATCGCCCTGAGCTGGGGGGTTAATTGTGGAAAACGTTCTGGCCGATGGC  
TCACTTTCCGATAGTTTCGAAGGACGTCTGGTAAATCCCGACATGCAATTGAGGC  
CATGTGGTTTATTATGGACCTGGGAAAAGCGTTTGAACCGCCCCGATTTAATCGAAA  
AAGCCAAAAACATTACCTTGGGATGTTAAATTACGGGTGGGATAAGCAGTACGGC  
GGAATCTACTATTTTATGGACCGCCTTGATAAGCCACCTCAGCAACTGGAATGGGA  
TCAAAAACCTTTGGTGGGTACATATTGAGACGCTGATTGCTTTACTGAAAGGTTACC  
ATCTGACCGGCGACGAGCAGTGTGGAAATGGTTTGAAAAAGTACATGACTATGTC  
TGGAGTCACTTAAGGACCCGGAGTATCCGGAATGGTACGTTATCTGAACCGTC  
GCGGAGAAGTTTTACTGCCGCTTAAGGGTGGGAAGTGAAGGGCTGTTTTCATA  
GCCCCGCGGTTTGTATCAGTGCTGGAAGGTCCTTTCTGACATCTCGGAGAAA\*  
ATGAGCAAAGGAGAAGAACTTTTTCACTGGAGTTGTCCCAATTCTTGTTGAATTAGAT  
GGTGTGTTAATGGGCACAAATTTTCTGTCCGTGGAGAGGGTGAAGGTGATGCTA  
CAAACGGAAAACCTCACCTTAAATTTATTTGCACTACTGGAAAACCTACCTGTTCCGT  
GGCCAACACTTGTCACTACTCTGACCTATGGTGTTCATGCTTTTCCCGTTATCCG  
GATCACATGAAACGGCATGACTTTTTCAAGAGTGCCATGCCCGAAGGTTATGTACA  
GGAACGCACTATATCTTTCAAAGATGACGGGACCTACAAGACGCGTGCTGAAGTC  
AAGTTTGAAGGTGATACCCTTGTTAATCGTATCGAGTTAAAGGGTATTGATTTTAAA  
GAAGATGGAAACATTCTTGACACAAACTCGAGTACAACCTTAACTCACACAATGT  
ATACATCACGGCAGACAAACAAAAGAATGGAATCAAAGCTAACTTCAAATTCGCC  
ACAACGTTGAAGATGGTTCCGTTCAACTAGCAGACCATTATCAACAAAATACTCCA  
ATTGGCGATGGCCCTGTCTTTTACCAGACAACCATTACCTGTCGACACAATCTGT  
CCTTTGAAAAGATCCCAACGAAAAGCGTGACCACATGGTCTTCTTGAGTTTGTA  
CTGCTGCTGGGATTACACATGGCATGGATGAGCTCTACAAA\*  
ATGGTTTCAAAGGTGAAGAATTATTCACCGGGGTTGTACCTATTCTCGTGGAGCT  
CGACGGCGATGTCAATGGACACAAGTTCAGCGTGTGAGGTGAGGGTGAAGGCGA  
TGCCACCTATGGCAAATTAACCTCTCAAGTTCATATGCACCACCGGCAAACCTGCCTG  
TCCATGGCCAACTTTAGTAACGACACTTACATGGGGCGTCCAGTGTCTCACGG  
TATCCAGACCATATGAAGCAGCACGACTTCTTTAAGAGCGCTATGCCGGAAGGGT  
ACGTGCAGGAAAGAACGATCTTCTTTAAGGATGATGGGAACTATAAGACCCGTGC

GFP

CFP

CGAAGTAAAATTTGAGGGAGACTCTTGTAACCGGATTGAGTTGAAGGGAATCG  
 ACTTCAAAGAGGACGGTAACATCCTTGGGCATAAGTTAGAGTATAATTACATTTCC  
 CACAATGTTTACATCACGGCTGACAAGCAAAAAAATGGGATAAAAGCTAATTTCAA  
 GATACGTCATAATATAGAGGACGGAAGCGTGCAACTGGCCGATCATTACCAACAG  
 AACACTCCTATTGGCGATGGACCAGTCCTTCTGCCGGATAATCACTATCTTTCAAC  
 GCAAAGCAAGCTCTCAAAGACCCTAATGAGAAGCGGGACCATATGGTTTTGCTT  
 GAGTTCGTTACTGCCGCGGGCATTACGCTTGGCATGGACGAACTCTATAAA\*  
 ATGGTTTCTGAACTGATCAAAGAAAACATGCACATGAAACTGTACATGGAAGGTAC  
 CGTTAAACAACCACCACTTCAAATGCACCTCTGAAGGTGAAGGTAAACCGTACGAAG  
 GTACCCAGACCATGCGTATCAAAGCTGTTGAAGGTGGTCCGCTGCCGTTTCGCTTTt  
 GACATCCTGGCTACCTCTTTTCATGTACGGTTCTAAAACCTTCATCAACCACACCCA  
 GGGTATCCCGGACTTtTTCAAACAGTCTTTCCCGGAAGGTTTTCACCTGGGAACGTG  
 TTACCACCTACGAAGACGGTGGTGTCTGACCGCTACCCAGGACACCTCTCTGcaa  
 mKate GACGGTTGCCTGATCTACAACGTTAAAATCCGTGGTGTAACTTCCCGTCTAACGG  
 TCCGGTTATGCAGAAAAAACCCCTGGGTTGGGAAGCTTCTACCGAAACCCTGTAC  
 CCGGCTGACGGTGGTCTGGAAGGTCGTGCTGACATGGCTCTGAAACTGGTTGGT  
 GGTGGTCACCTGATCTGCAACCTGAAAACCACCTACCGTTCTAAAAAACCGGCTAA  
 AAACCTGAAAATGCCGGGTGTTTACTACGTTGACCGTCGTCTGGAACGTATCAAAG  
 AAGCTGACAAAGAAACCTACGTTGAACAGCACGAAGTTGCTGTTGCTCGTTACTGC  
 GACCTGCCGTCTAAACTGGGTCACCGT\*

#### Supplementary Table S4 Strains used in this study

| Strain                       | Characteristics                                                                                                                          | Ref.      |
|------------------------------|------------------------------------------------------------------------------------------------------------------------------------------|-----------|
| <i>E. coli</i> JM109         | <i>recA1, endA1, thi, gyrA96, supE44, hsdR17Δ</i><br>( <i>lac-proAB</i> )/F'[traD36, proAB <sup>+</sup> , lacI <sup>q</sup> , lacZΔ M15] | Lab stock |
| <i>E. coli</i> BL21<br>(DE3) | F <sup>-</sup> , <i>ompT, hsdSB</i> (rB <sup>-</sup> mB <sup>-</sup> ), <i>gal, dcm</i>                                                  | Lab stock |
| <i>B. subtilis</i> 168       | <i>trpC2</i>                                                                                                                             | Lab stock |
| <i>B. subtilis</i> S5        | <i>B. subtilis</i> 168 Δ <i>gamPΔgamAΔnagAΔnagBΔldhΔpta::lox72, P<sub>43</sub>-glmS</i>                                                  | Lab stock |
| MT1                          | Δ <i>nprE::P<sub>43</sub>-manC-gmd-Ter-P<sub>43</sub>-wcaG, Δbpr::P<sub>43</sub>-manB-Ter-P<sub>43</sub>-futC</i>                        | Lab stock |
| <i>E. coli</i> BL21-X        | <i>E. coli</i> BL21 (DE3) derivate, with pHT28a derivate plasmid for protein purification                                                | This work |
| <i>B. subtilis</i> Trs       | <i>B. subtilis</i> 168 derivate, pBUA-Trs                                                                                                | This work |
| <i>B. subtilis</i> A1        | <i>B. subtilis</i> Trs derivate, p43NMK-P <sub>grac</sub> -AGE                                                                           | This work |

|                       |                                                                                                                                                                                                                                |           |
|-----------------------|--------------------------------------------------------------------------------------------------------------------------------------------------------------------------------------------------------------------------------|-----------|
| <i>B. subtilis</i> A2 | <i>B. subtilis</i> Trs derivate, p43NMK-P <sub>grac</sub> -AGE <sup>OMeY</sup>                                                                                                                                                 | This work |
| YSC0                  | <i>B. subtilis</i> 168 derivate, pHT-P <sub>grac</sub> -GFP                                                                                                                                                                    | This work |
| YSC1                  | <i>B. subtilis</i> 168 derivate, pHT-P <sub>grac</sub> -SIDP1-GFP                                                                                                                                                              | This work |
| YSC2                  | <i>B. subtilis</i> 168 derivate, pHT-P <sub>grac</sub> -RIAD-SIDP1-GFP                                                                                                                                                         | This work |
| YSC3                  | <i>B. subtilis</i> 168 derivate, p43NMK-P <sub>grac</sub> -mKate-RIDD                                                                                                                                                          | This work |
| YSC4                  | YSC1 derivate, p43NMK-P <sub>grac</sub> -mKate-RIDD                                                                                                                                                                            | This work |
| YSC5                  | YSC2 derivate, p43NMK-P <sub>grac</sub> -mKate-RIDD                                                                                                                                                                            | This work |
| YSC6                  | YSC2 derivate, p43NMK-P <sub>xyIA</sub> -mKate-RIDD                                                                                                                                                                            | This work |
| YSC1-2                | <i>B. subtilis</i> 168 derivate, pHT-SIDP2                                                                                                                                                                                     | This work |
| YSC1-3                | <i>B. subtilis</i> 168 derivate, pHT-FUSN                                                                                                                                                                                      | This work |
| YSC1-4                | <i>B. subtilis</i> 168 derivate, pHT-3RGG                                                                                                                                                                                      | This work |
| YSC1-5                | <i>B. subtilis</i> 168 derivate, pHT-SIDP4                                                                                                                                                                                     | This work |
| YSC1-21               | YSC1-2 derivate, p43NMK-P <sub>grac</sub> -mKate-RIDD                                                                                                                                                                          | This work |
| YSC1-31               | YSC1-3 derivate, p43NMK-P <sub>grac</sub> -mKate-RIDD                                                                                                                                                                          | This work |
| YSC1-41               | YSC1-4 derivate, p43NMK-P <sub>grac</sub> -mKate-RIDD                                                                                                                                                                          | This work |
| YSC1-51               | YSC1-5 derivate, p43NMK-P <sub>grac</sub> -mKate-RIDD                                                                                                                                                                          | This work |
| YSC7                  | <i>B. subtilis</i> 168 derivate, $\Delta$ yesZ::P <sub>spovG</sub> - <sup>RIDD</sup> VioA-Ter-P <sub>43</sub> - <sup>RIDD</sup> VioB-Ter-P <sub>veg</sub> - <sup>RIDD</sup> VioE                                               | This work |
| YSC8                  | <i>B. subtilis</i> 168 derivate, $\Delta$ yesZ::P <sub>spovG</sub> - <sup>RIDD</sup> VioA-Ter-P <sub>43</sub> - <sup>RIDD</sup> VioB-Ter-P <sub>veg</sub> - <sup>RIDD</sup> VioE-Ter-P <sub>spovG</sub> - <sup>RIDD</sup> VioC | This work |
| YSC9                  | YSC7 derivate, pHT-SIDP1                                                                                                                                                                                                       | This work |
| YSC10                 | YSC8 derivate, pHT-SIDP1                                                                                                                                                                                                       | This work |
| YSC11                 | <i>B. subtilis</i> 168 derivate, pHT-P <sub>grac</sub> -div-SIDP1-GFP                                                                                                                                                          | This work |
| YSC12                 | <i>B. subtilis</i> 168 derivate, pHT-P <sub>grac</sub> -divmut-SIDP1-GFP                                                                                                                                                       | This work |
| YSC13                 | <i>B. subtilis</i> 168 derivate, pBUA-Trs-F2                                                                                                                                                                                   | This work |
| YSC14                 | <i>B. subtilis</i> 168 derivate, pBUA-div-Trs-F2                                                                                                                                                                               | This work |
| YSC15                 | <i>B. subtilis</i> 168 derivate, pBUA-divmut-Trs-F2                                                                                                                                                                            | This work |
| YSC16                 | <i>B. subtilis</i> 168 derivate, pBUA-Trs-SIDP3-F2                                                                                                                                                                             | This work |
| YSC17                 | <i>B. subtilis</i> 168 derivate, pBUA-Trs-SIDP1-F2                                                                                                                                                                             | This work |
| YSC18                 | <i>B. subtilis</i> 168 derivate, pBUA-div-Trs-SIDP1-F2                                                                                                                                                                         | This work |
| YSC19                 | <i>B. subtilis</i> 168 derivate, pBUA-Trs-SIDP1                                                                                                                                                                                | This work |
| YSC20                 | <i>B. subtilis</i> Trs derivate, pADK-1                                                                                                                                                                                        | This work |
| YSC21                 | YSC13 derivate, pADK-1                                                                                                                                                                                                         | This work |
| YSC22                 | YSC14 derivate, pADK-1                                                                                                                                                                                                         | This work |
| YSC23                 | YSC15 derivate, pADK-1                                                                                                                                                                                                         | This work |

|       |                                                                                                                                                                                                       |           |
|-------|-------------------------------------------------------------------------------------------------------------------------------------------------------------------------------------------------------|-----------|
| YSC24 | YSC16 derivate, pADK-1                                                                                                                                                                                | This work |
| YSC25 | YSC17 derivate, pADK-1                                                                                                                                                                                | This work |
| YSC26 | YSC18 derivate, pADK-1                                                                                                                                                                                | This work |
| YSC27 | YSC19 derivate, pADK-1                                                                                                                                                                                | This work |
| YSC28 | YSC13 derivate, pADK-3                                                                                                                                                                                | This work |
| YSC29 | YSC14 derivate, pADK-3                                                                                                                                                                                | This work |
| YSC30 | YSC18 derivate, pADK-3                                                                                                                                                                                | This work |
| YSC31 | YSC13 derivate, pADK-2                                                                                                                                                                                | This work |
| YSC32 | YSC14 derivate, pADK-2                                                                                                                                                                                | This work |
| YSC33 | YSC17 derivate, pADK-2                                                                                                                                                                                | This work |
| YSC34 | YSC18 derivate, pADK-2                                                                                                                                                                                | This work |
| YSC35 | <i>B. subtilis</i> 168 derivate, pBUA-RIAD-Trs-F2, pADK-P <sub>43</sub> -GFP-RIDD                                                                                                                     | This work |
| YSC36 | <i>B. subtilis</i> 168 derivate, pBUA-RIAD-Trs-SIDP1-F2, pADK-P <sub>43</sub> -GFP-RIDD                                                                                                               | This work |
| YSC37 | YSC13 derivate, pADK-4                                                                                                                                                                                | This work |
| YSC38 | YSC17 derivate, pADK-4                                                                                                                                                                                | This work |
| MT1-1 | MT1 derivate, $\Delta$ yesZ, $\Delta$ ganA                                                                                                                                                            | This work |
| YW0   | MT1-1 derivate, $\Delta$ bpr::P <sub>43</sub> -manB <sup>RIDD</sup> -Ter-P <sub>43</sub> -futC                                                                                                        | This work |
| YW1   | MT1-1 derivate, $\Delta$ nprE::P <sub>43</sub> -manC <sup>RIDD</sup> -gmd-Ter-P <sub>43</sub> -wcaG                                                                                                   | This work |
| YW2   | MT1-1 derivate, $\Delta$ nprE::P <sub>43</sub> -manC <sup>RIDD</sup> -gmd-Ter-P <sub>43</sub> -wcaG                                                                                                   | This work |
| YW3   | MT1-1 derivate, $\Delta$ nprE::P <sub>43</sub> -manC-gmd-Ter-P <sub>43</sub> <sup>RIDD</sup> -wcaG                                                                                                    | This work |
| YW4   | MT1-1 derivate, $\Delta$ bpr::P <sub>43</sub> -manB-Ter-P <sub>43</sub> -futC <sup>RIDD</sup>                                                                                                         | This work |
| YW5   | YW1 derivate, $\Delta$ nprE::P <sub>43</sub> -manC <sup>RIDD</sup> -RIDD-gmd-Ter-P <sub>43</sub> <sup>RIDD</sup> -wcaG, $\Delta$ bpr::P <sub>43</sub> -manB-Ter-P <sub>43</sub> -futC <sup>RIDD</sup> | This work |
| YW6   | YW2 derivate, $\Delta$ nprE::P <sub>43</sub> -manC <sup>RIDD</sup> -gmd-Ter-P <sub>43</sub> <sup>RIDD</sup> -wcaG, $\Delta$ bpr::P <sub>43</sub> -manB-Ter-P <sub>43</sub> -futC <sup>RIDD</sup>      | This work |
| YW7   | YW0 derivate, $\Delta$ nprE::P <sub>43</sub> -manC <sup>RIDD</sup> -gmd-Ter-P <sub>43</sub> -wcaG                                                                                                     | This work |
| YW8   | YW7 derivate, $\Delta$ nprE::P <sub>43</sub> -manC <sup>RIDD</sup> -RIDD-gmd-Ter-P <sub>43</sub> -wcaG                                                                                                | This work |
| YW9   | YW8 derivate, $\Delta$ nprE::P <sub>43</sub> -manC <sup>RIDD</sup> -RIDD-gmd-Ter-P <sub>43</sub> <sup>RIDD</sup> -wcaG                                                                                | This work |
| YW10  | YW9 derivate, $\Delta$ bpr::P <sub>43</sub> -manB <sup>RIDD</sup> -Ter-P <sub>43</sub> -futC <sup>RIDD</sup>                                                                                          | This work |
| YW11  | YW5 derivate, pHT-SIDP1                                                                                                                                                                               | This work |
| YW12  | YW6 derivate, pHT-SIDP1                                                                                                                                                                               | This work |
| YW13  | YW8 derivate, pHT-SIDP1                                                                                                                                                                               | This work |
| YW14  | YW9 derivate, pHT-SIDP1                                                                                                                                                                               | This work |
| YW15  | YW10 derivate, pHT-SIDP1                                                                                                                                                                              | This work |

|      |                                                                                                                  |           |
|------|------------------------------------------------------------------------------------------------------------------|-----------|
| YW16 | YW10 derivate, pHT-SIDP2                                                                                         | This work |
| YW17 | YW10 derivate, pHT-FUSN                                                                                          | This work |
| YW18 | YW10 derivate, pHT-3RGG                                                                                          | This work |
| YW19 | YW10 derivate, pHT-SIDP4                                                                                         | This work |
| MA1  | <i>B. subtilis</i> S5 derivate, $\Delta$ yesZ::P <sub>43</sub> -GNA1-age                                         | This work |
| MA2  | MA1 derivate, pBUA-Trs                                                                                           | This work |
| MAO1 | <i>B. subtilis</i> S5 derivate, $\Delta$ yesZ::P <sub>43</sub> -GNA1-age <sup>OMeY</sup> , pBUA-Trs              | This work |
| MAO2 | <i>B. subtilis</i> S5 derivate, $\Delta$ yesZ::P <sub>43</sub> -GNA1-age <sup>OMeY</sup> , pBUA-div-Trs-SIDP1-F2 | This work |

---



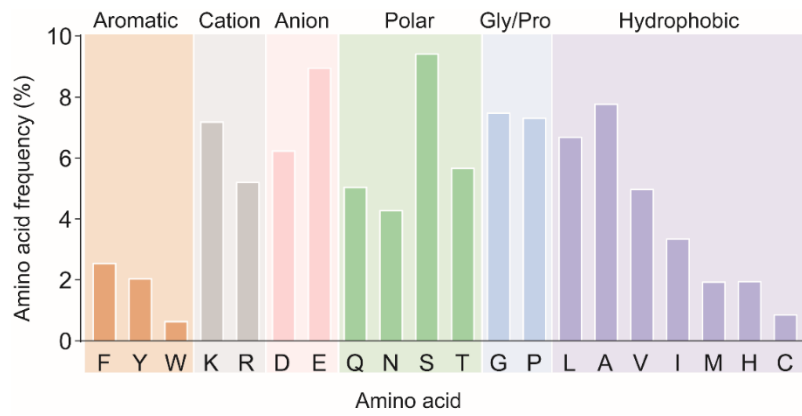

**Supplementary Fig. 1 Graph of frequency in amino acid composition of natural IDPs that form biomolecular condensates.**

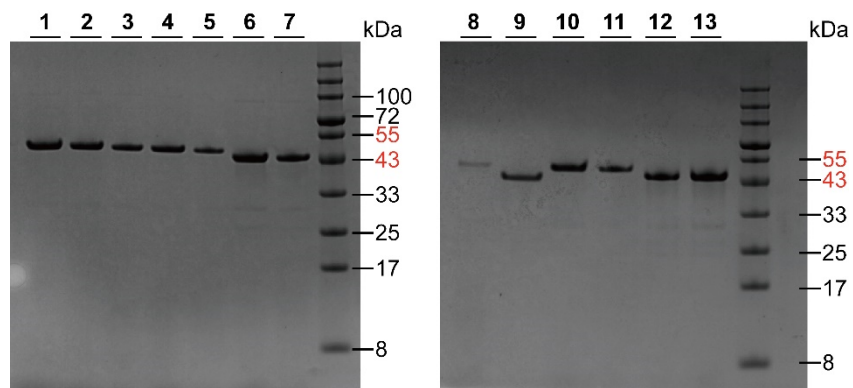

**Supplementary Fig. 2 The SDS-PAGE gels of SIDPs.** The numbers 1-13 in the image correspond to SIDP1-GFP through SIDP13-GFP, respectively. Source data provided as a Source Data file.

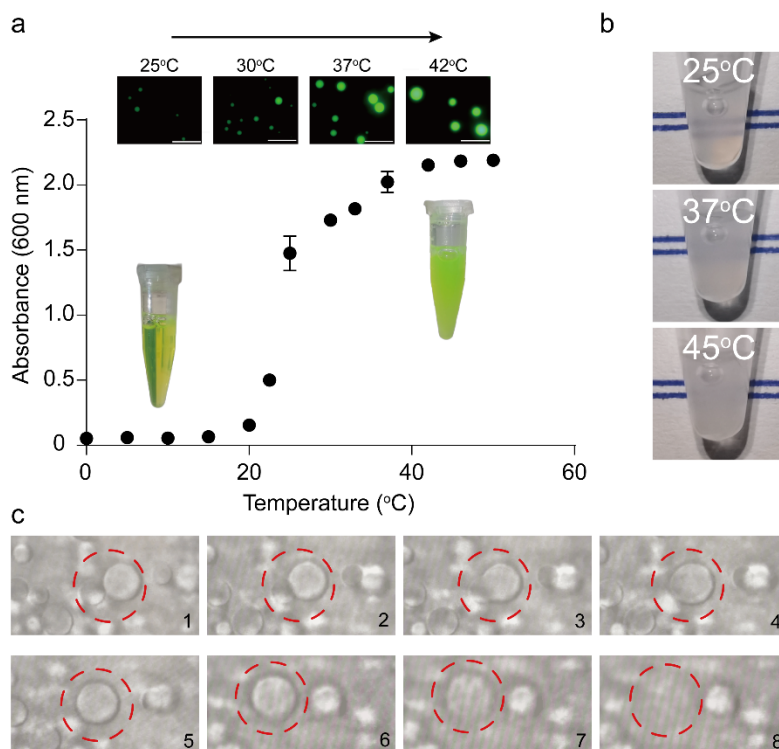

**Supplementary Fig. 3 Turbidity analysis of different temperature in physiological buffer.**

Representative turbidity measurements showed temperature-responsive phase behavior of SIDP1-GFP (a) and SIDP1 (b) at protein concentration of  $\sim 50 \mu\text{M}$  in physiological buffer (150 mM NaCl, pH 7.4, without PEG2000). Both SIDP1-GFP and SIDP1 exhibited lower critical solution temperature phase behavior. Specifically, they were transparent at low temperatures, but upon heating, they underwent phase separation and became visibly turbid. (c) The state changes of SIDP1-GFP condensates during the transition from 37°C to 20°C. Data are presented as mean  $\pm$  s.d. of three biologically independent replicates. Scale bars = 10  $\mu\text{m}$ . Source data provided as a Source Data file.

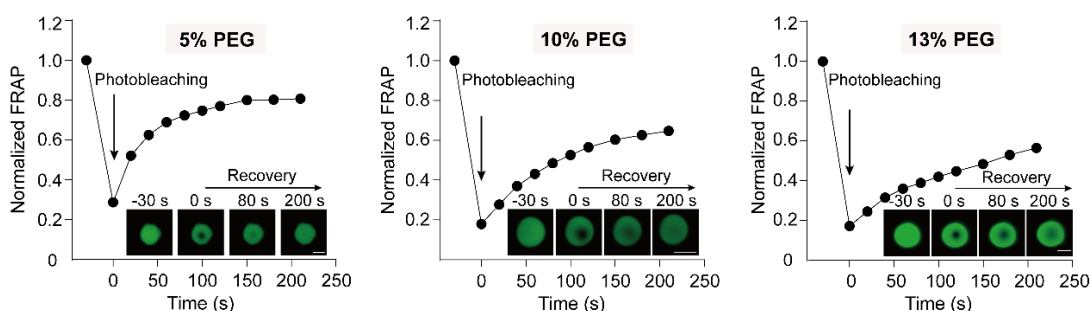

**Supplementary Fig. 4 Representative fluorescence recovery of synthetic condensates under varying molecular crowding agent concentrations.** Fluorescence recovery after photobleaching (FRAP) measurement of dynamic protein diffusion inside SIDP1-GFP driven droplets with different PEG2000 concentration ( $\sim 50 \mu\text{M}$  protein concentration, 150 mM NaCl,

pH=7.4, ~25°C). FRAP recovery curves (top) and images (bottom) were shown. Data are presented as mean  $\pm$  s.d. of three biologically independent replicates. Scale bars = 5  $\mu$ m. Source data provided as a Source Data file.

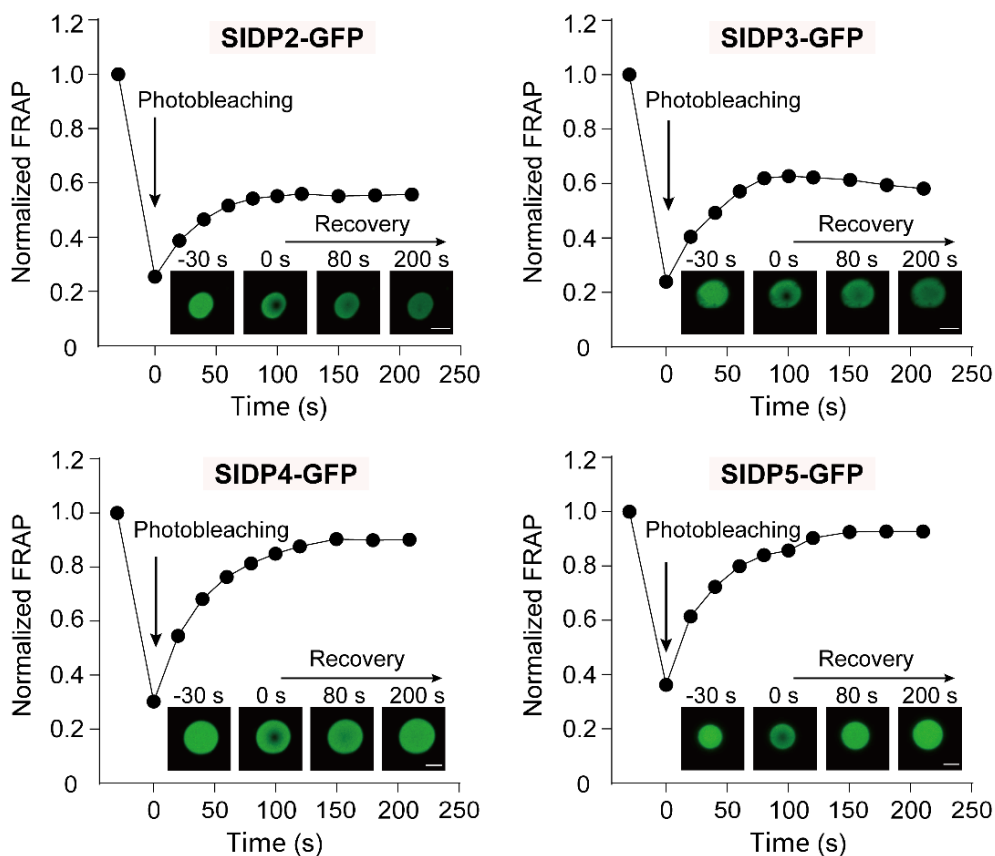

**Supplementary Fig. 5 Fluorescence recovery after photobleaching (FRAP) measurement of dynamic protein diffusion inside SIDP2-GFP, SIDP3-GFP, SIDP4-GFP, and SIDP5-GFP droplets under condensate formation buffer.** FRAP recovery curves (top) and images (bottom) were shown (~50  $\mu$ M protein concentration, 150 mM NaCl, pH=7.4, ~25°C, without PEG2000). Data are presented as mean  $\pm$  s.d. of three biologically independent replicates. Scale bars = 5  $\mu$ m. Source data provided as a Source Data file.

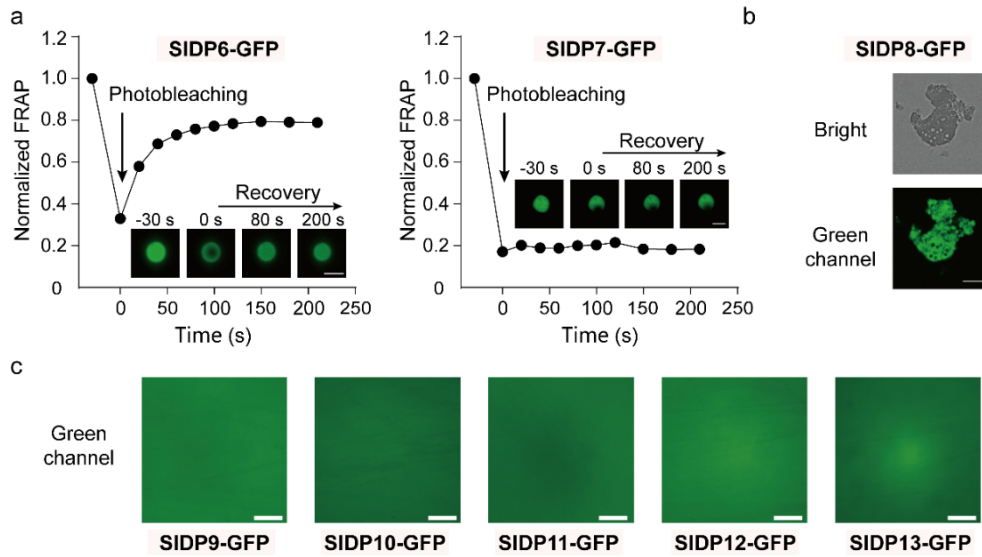

**Supplementary Fig. 6 Phase separation of the SIDP6-GFP, SIDP7-GFP, and SIDP8-GFP under condensate formation buffer.** (a) Representative FRAP images of ~50  $\mu\text{M}$  SIDP6-GFP and SIDP7-GFP condensates (150 mM NaCl, pH=7.4, ~25°C, without PEG2000). The inset showed images of photobleaching on the droplet. (b) Amorphous and irreversible structures were observed when approximately 50  $\mu\text{M}$  SIDP8-GFP was applied for condensate formation. Scale bars = 5  $\mu\text{m}$ . (c) no condensates were observed when approximately 150  $\mu\text{M}$  SIDP9-GFP, SIDP10-GFP, SIDP11-GFP, SIDP12-GFP and SIDP10-GFP were applied for condensate formation, respectively. Data are presented as mean  $\pm$  s.d. of three biologically independent replicates. Scale bars = 10  $\mu\text{m}$ . Source data provided as a Source Data file.

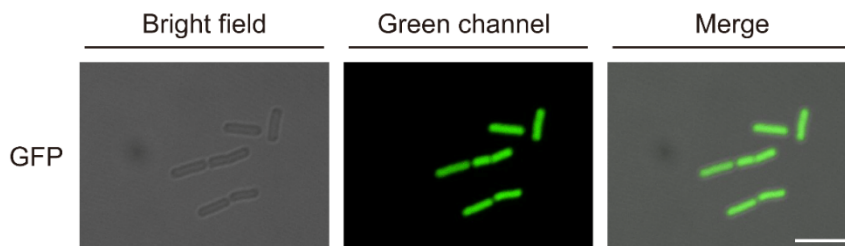

**Supplementary Fig. 7 The fluorescence microscopy images of *B. subtilis* expressing GFP at 37°C.** Microscopy experiments were repeated in three independent experiments with similar results. Scale bars = 5  $\mu\text{m}$ .

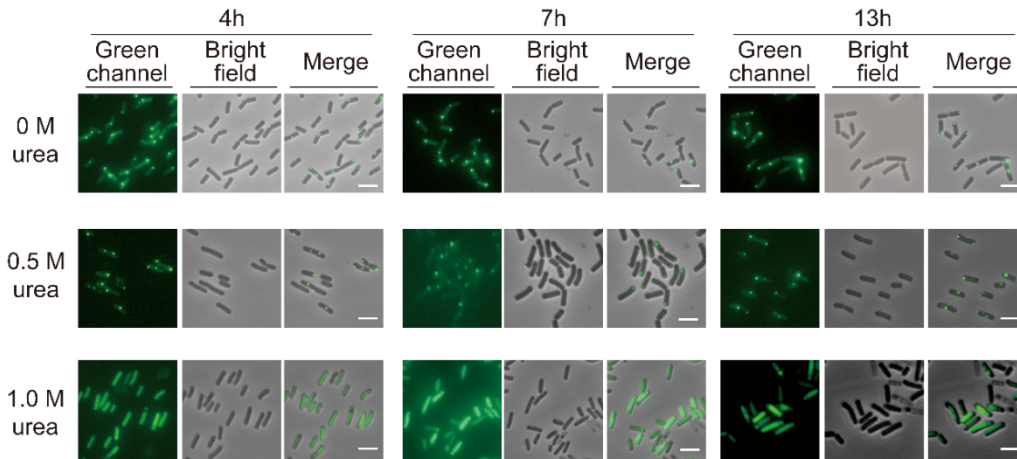

**Supplementary Fig. 8 Characterization of dynamic compartments within *B. subtilis* through urea perturbation.** Images of SIDP1-GFP expressing cells treated with varying levels of urea. Sampling was performed at 4, 7, and 13 h after induction, and the recombinant *B. subtilis* were harvested and resuspended in PBS buffer with and without the addition of urea. Following incubation at ~25°C for 20 min, the cells were imaged. Microscopy experiments were repeated in three independent experiments with similar results. Scale bars = 5  $\mu$ m.

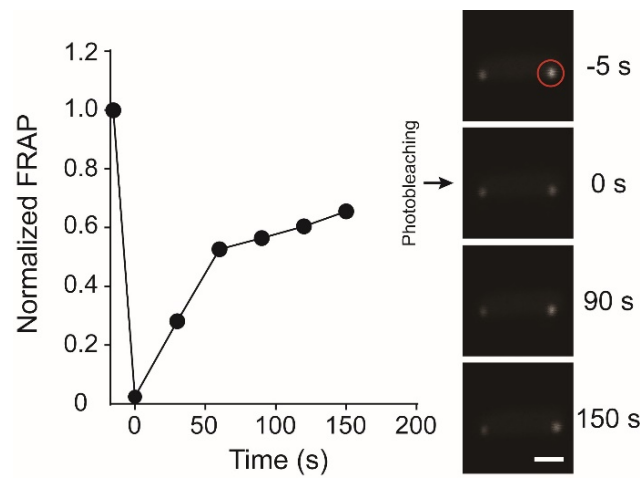

**Supplementary Fig. 9 Fluorescence recovery after photobleaching (FRAP) of SIDP1-GFP in cells.** The red circle indicates the bleached area. Data are represented as mean  $\pm$  standard error from  $n = 3$  (SIDP1-GFP) biologically independent cells. Representative images shown alongside. Scale bars = 1  $\mu$ m. Source data provided as a Source Data file.

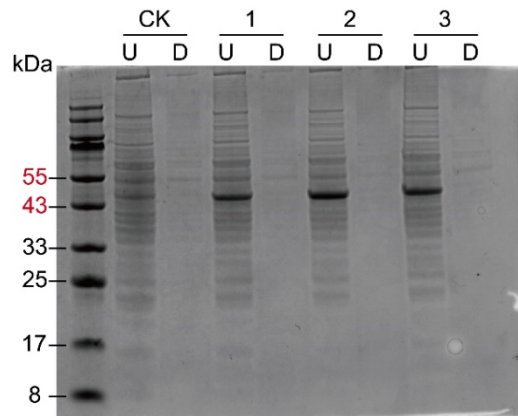

**Supplementary Fig. 10 The solubility of the intracellular condensates.** “CK” represents the *B. subtilis* 168. Besides, 1, 2, and 3 represent experimental groups where SIDP1-GFP, SIDP2-GFP, and SIDP4-GFP were expressed under isopropyl- $\beta$ -d-thiogalactoside (IPTG) induction concentrations of 0.5 mM, respectively. In addition, “U” represents the supernatant fluid after sonication, and “D” represents the sediment. Source data provided as a Source Data file.

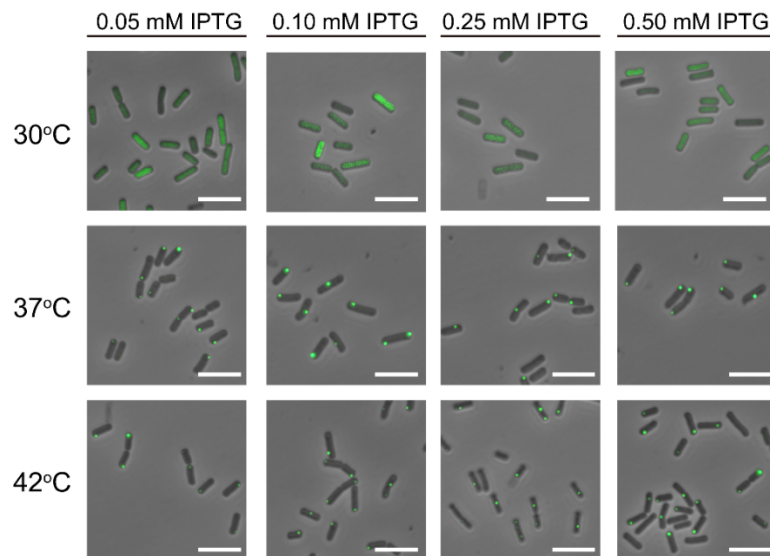

**Supplementary Fig. 11 Representative images of cellular condensate formation in *B. subtilis* expressing SIDP1-GFP under varying levels of isopropyl- $\beta$ -d-thiogalactoside (IPTG) and temperatures.** Microscopy experiments were repeated in three independent experiments with similar results. Scale bars = 5  $\mu$ m.

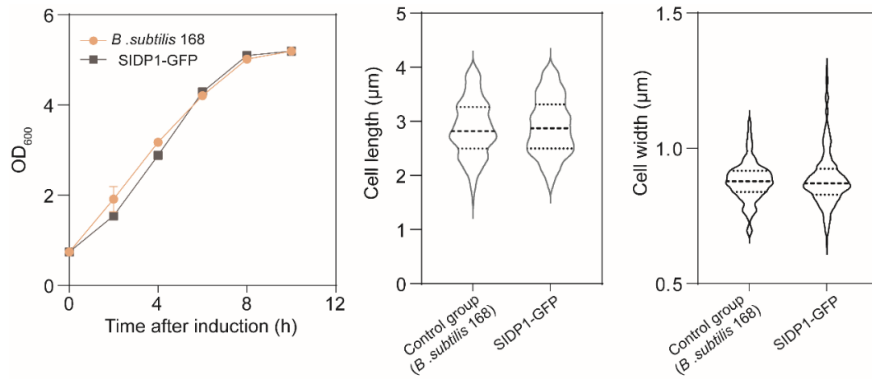

**Supplementary Fig. 12 Effects of formation of synthetic condensates on the cell growth and morphology.** The cell growth (left, data are presented as mean  $\pm$  s.d. of three biologically independent replicates), length (middle,  $n = 204$  biologically independent cells), and width (right,  $n = 204$  biologically independent cells) of *B. subtilis* expressing SIDP1-GFP, and the control group (*B. subtilis* 168) harboring empty vector. Source data provided as a Source Data file.

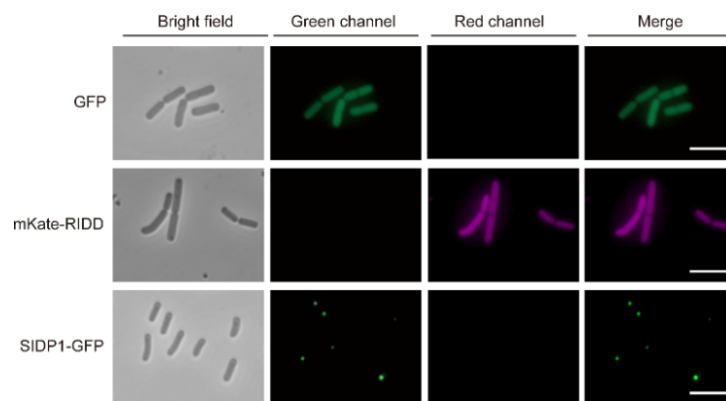

**Supplementary Fig. 13 Co-expression of GFP, mKate-RIDD, and untagged SIDP1-GFP serves as a control related to Fig. 3a.** Microscopy experiments were repeated in three independent experiments with similar results. Scale bars = 5  $\mu\text{m}$ .

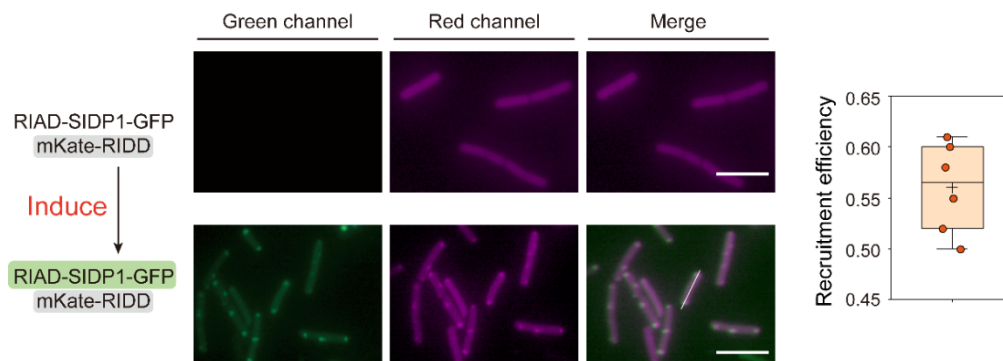

**Supplementary Fig. 14 Representative images of *B. subtilis* expressing RIAD-SIDP1-GFP**  
23

and mKate-RIDD driven by isopropyl- $\beta$ -d-thiogalactoside (IPTG) and xylose operon, respectively. The first three columns indicate the dual-channel imaging and merging images of RIAD-SIDP1-GFP and mKate-RIDD. The fourth column represents the ratio of mKate fluorescence intensity of condensates to that of the whole cell ( $n = 6$  biologically independent cells). The box plot shows the mean value as a black cross, the center as a black line, box extending between the 25<sup>th</sup> and 75<sup>th</sup> percentiles, and whiskers indicating minimum and maximum data points. Scale bars = 5  $\mu$ m. Source data provided as a Source Data file.

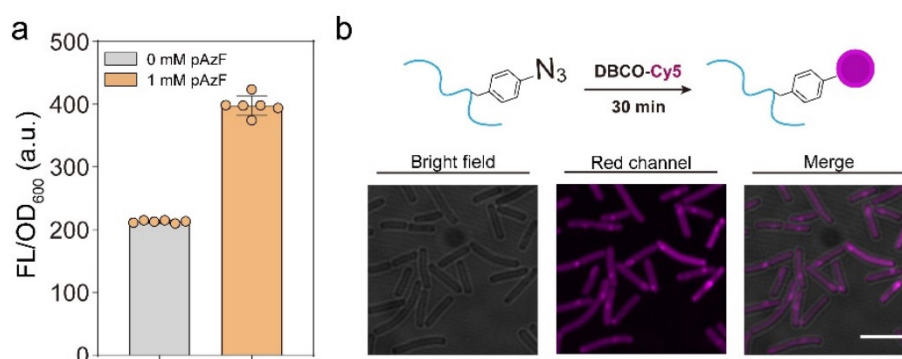

**Supplementary Fig. 15 Validation of whether small molecule compounds can diffuse into cellular condensates.** (a) Testing the feasibility of p-Azido-L-phenylalanine (pAzF) incorporation system using the reporter protein GFP<sup>3TAG</sup>. (b) Labelling of cellular condensates with a small molecule fluorescent dye. The synthetic condensates are formed by SIDP1<sup>TAG</sup> with pAzF residues, which present a bio-orthogonal azide that can be labelled in situ with DBCO-Cy5. DBCO-Cy5 mixture can diffuse into the cellular SIDP1 condensates and label the azide group. Data are presented as mean  $\pm$  s.d. of six biologically independent replicates. Scale bars = 5  $\mu$ m. Source data provided as a Source Data file.

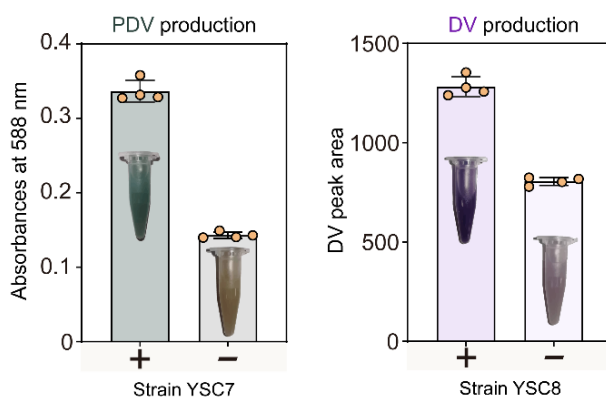

**Supplementary Fig. 16 Microplate reader and high-performance liquid chromatography quantification of prodeoxyviolacein (PDV) and desoxyviolacein (DV), respectively.** The



“+” represents the presence of cellular condensates, while the “-” indicates the absence. Data are presented as mean  $\pm$  s.d. of four biologically independent replicates. Source data provided as a Source Data file.

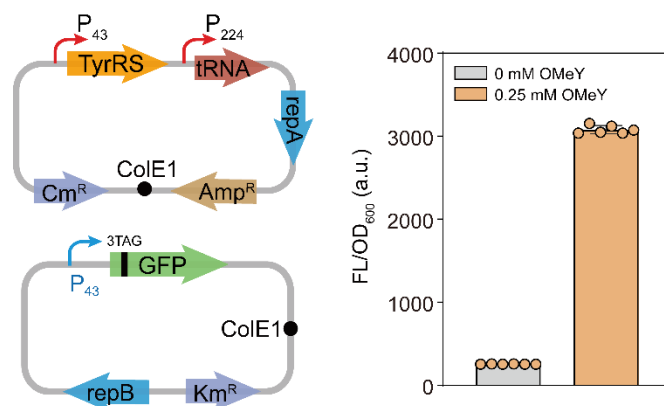

**Supplementary Fig. 17 Construction of O-methyl-tyrosine (OMeY) incorporation tool in *B. subtilis*.** The OMeY incorporation tool was constructed based on the pHT01 plasmid by integrating *TyrRS* and *tRNA* under the control of  $P_{43}$  and  $P_{224}$ , respectively. Testing the specific incorporation using the reporter protein  $GFP^{3TAG}$ . The histogram represents the degree of GFP expression after replacing one original codons by amber stop codons in the sequence from the third codon (3TAG). Data are presented as mean  $\pm$  s.d. of six biologically independent replicates. Source data provided as a Source Data file.

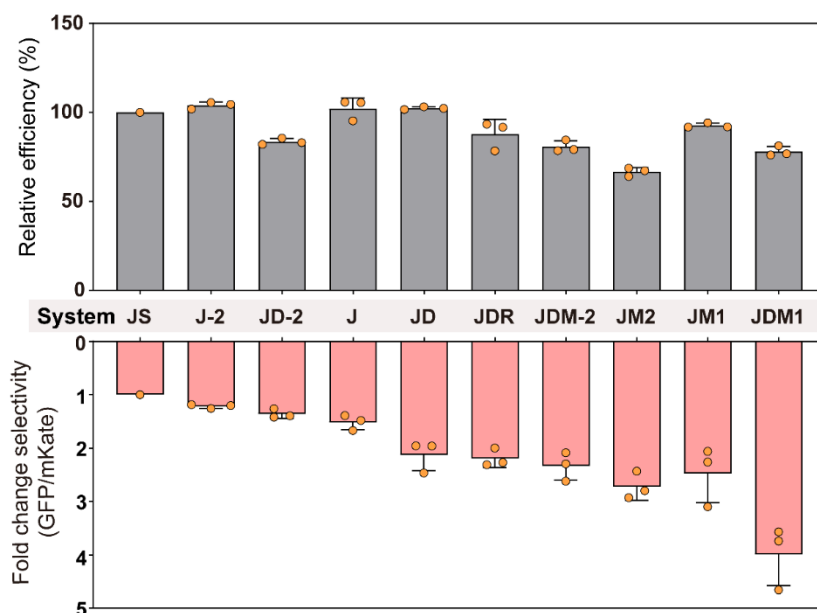

**Supplementary Fig. 18 Testing the spatially separated orthogonal translation in *B. subtilis*.** The bottom bars (normalized to JS system) represent the fold change in the ratios of

the mean fluorescence intensities of GFP versus mKate for all the systems tested. The top bars represent the relative efficiency as defined by the mean fluorescence intensity of GFP for each condition divided by JS system (SIDP1 and TyrRS) control. Data are presented as mean  $\pm$  s.d. of three biologically independent replicates. Source data provided as a Source Data file.

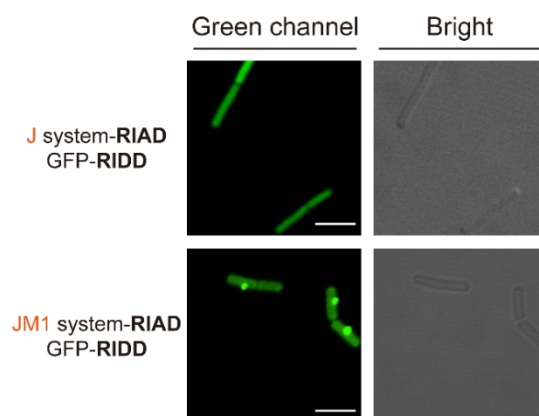

**Supplementary Fig. 19 The formation of functional condensates in *B. subtilis*.** The functional condensates were formed by TyrRS-SIDP1-F2 fusion protein. Microscopy experiments were repeated in three independent experiments with similar results. Scale bars = 5  $\mu$ m.

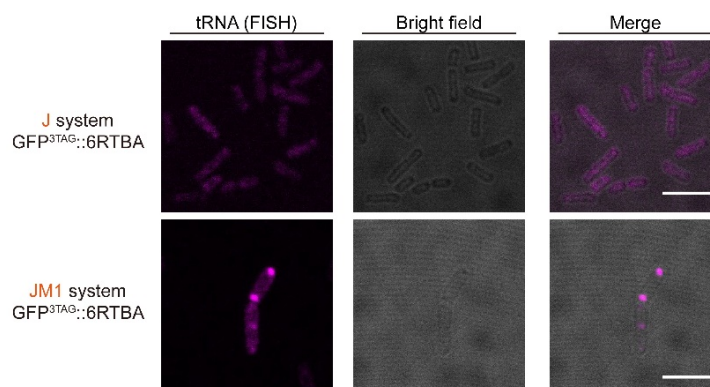

**Supplementary Fig. 20 Fluorescence in situ hybridization (FISH) imaging of recombinant *B. subtilis* with J and JM1 system, respectively.** For simplicity, a single-color GFP<sup>3TAG</sup>::6RTBA reporter was used instead of the dual-color reporter. Microscopy experiments were repeated in three independent experiments with similar results. Scale bar = 5  $\mu$ m.

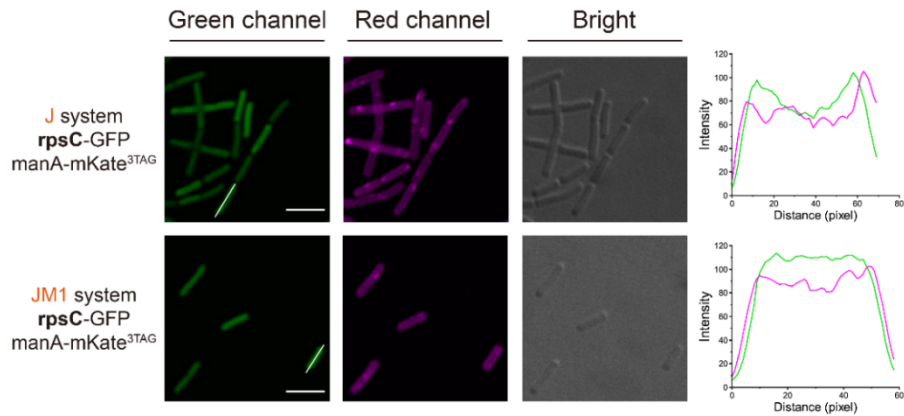

**Supplementary Fig. 21 Synthetic condensates enrich ribosomes for orthogonal translation.** The representative confocal images of recombinant *B. subtilis* with J and JM1 system are shown, respectively. Shown from left to right are ribosomal protein rpsC (green), mKate<sup>3TAG</sup> (red), merge, and line profiles for the rpsC and mKate<sup>3TAG</sup> channels (green and red curves, respectively). Microscopy experiments were repeated in three independent experiments with similar results. Scale bar = 5  $\mu$ m.

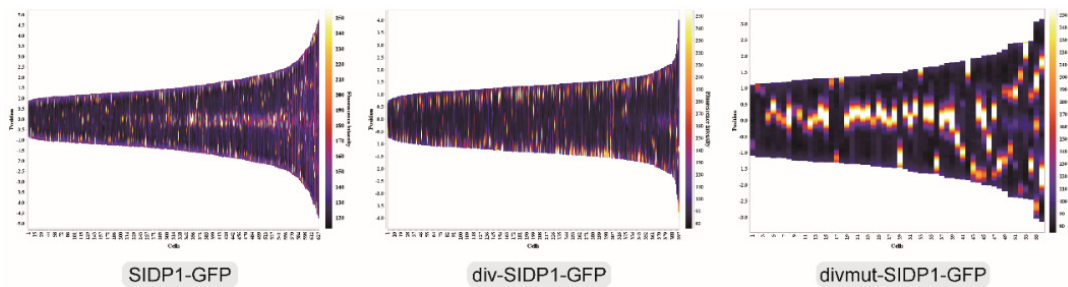

**Supplementary Fig. 22 The intracellular spatial distribution of different fusion protein-driven condensates.** Localization patterns of SIDP1-GFP, div-SIDP1-GFP (fusing the N-terminal 60 amino acids of the gene *divIVA* to SIDP1-GFP), and divmut-SIDP1-GFP (fusing the N-terminal 60 amino acids of the gene *divIVA*<sup>R18C</sup> to SIDP1-GFP) were quantified, respectively. Vertical heatmaps representing intensities of fluorescent protein across the long cell axis were generated using ImageJ.

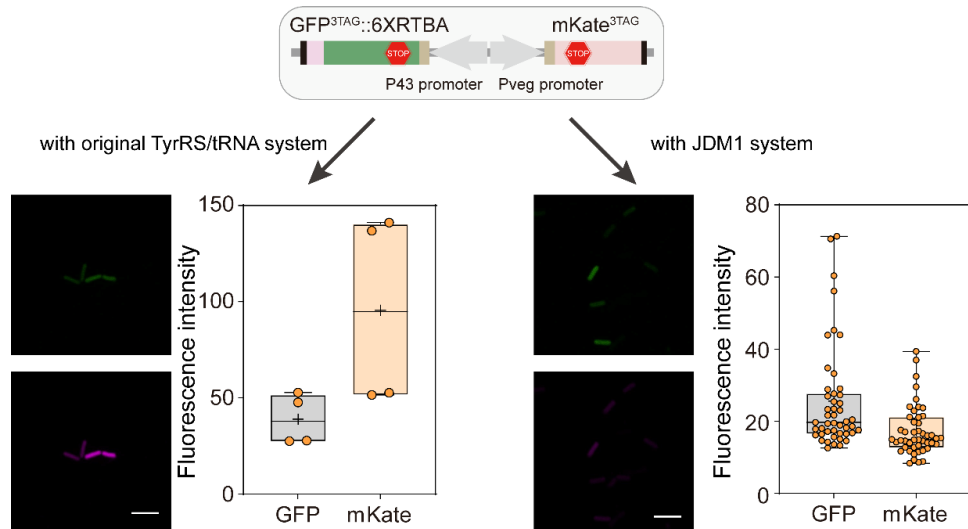

**Supplementary Fig. 23 The representative confocal images of the spatially separated orthogonal translation system.** The left column shows the representative confocal images of the strain YSC20 (with original TyrRS/tRNA system), while the representative confocal images of strain expressing the JDM1 system are on the right. Besides, the corresponding fluorescence intensities have also been calculated and provided (left,  $n = 4$  biologically independent cells; right,  $n = 47$  biologically independent cells). The box plots show the mean value as a black cross, the center as a black line, box extending between the 25<sup>th</sup> and 75<sup>th</sup> percentiles, and whiskers indicating minimum and maximum data points. Source data provided as a Source Data file.

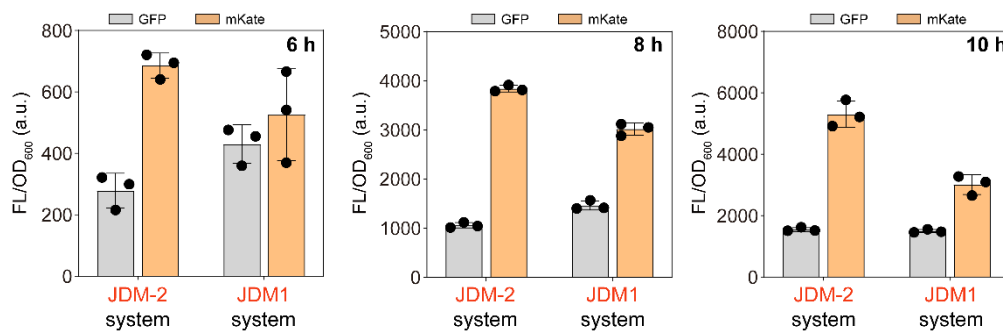

**Supplementary Fig. 24 Trends of the dual-reporter fluorescence intensity within recombinant *B. subtilis* with JDM-2 and JDM1 system, respectively.** Data are presented as mean  $\pm$  s.d. of three biologically independent replicates. Source data provided as a Source Data file.

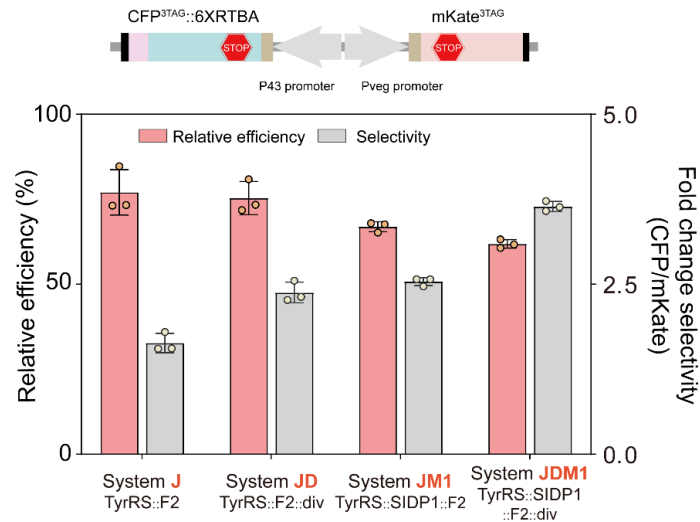

**Supplementary Fig. 25 Validation of the universality of the spatially separated orthogonal translation system.** The target gene was substituted with CFP, and the 6RTBA loop was additionally fused to the 3' untranslated region of CFP for functional characterization. Data are presented as mean  $\pm$  s.d. of three biologically independent replicates. Source data provided as a Source Data file.

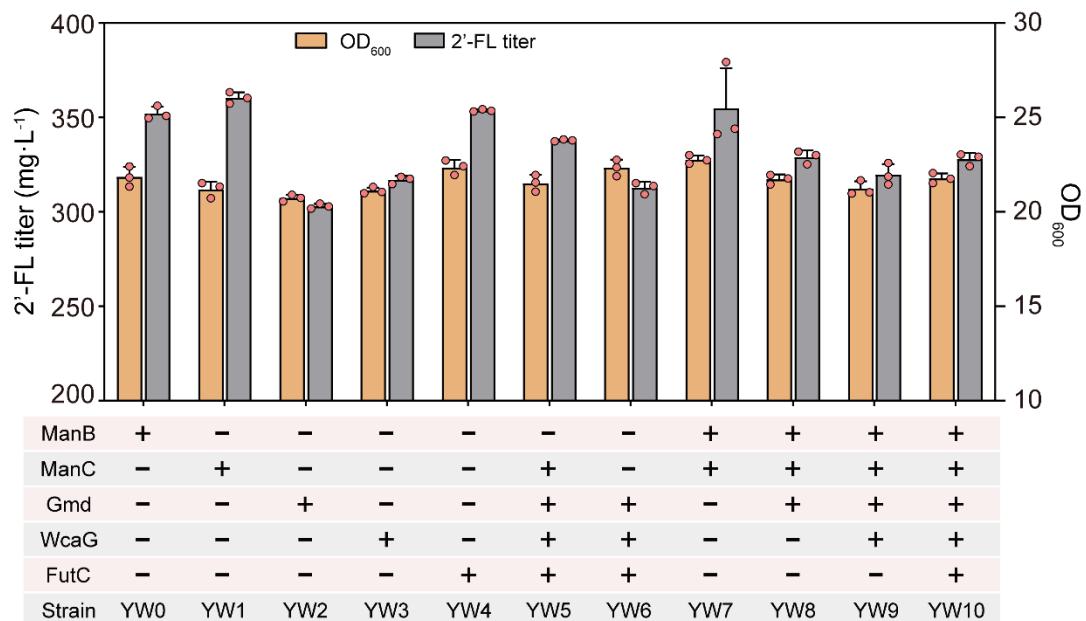

**Supplementary Fig. 26 The effects of fusion RIDD peptide on the 2'-fucosyllactose (2'-FL) production.** The "+" signifies that the enzyme is fused with the RIDD peptide, while "-" represents enzymes that are not fused. Data are presented as mean  $\pm$  s.d. of three biologically independent replicates. Source data provided as a Source Data file.

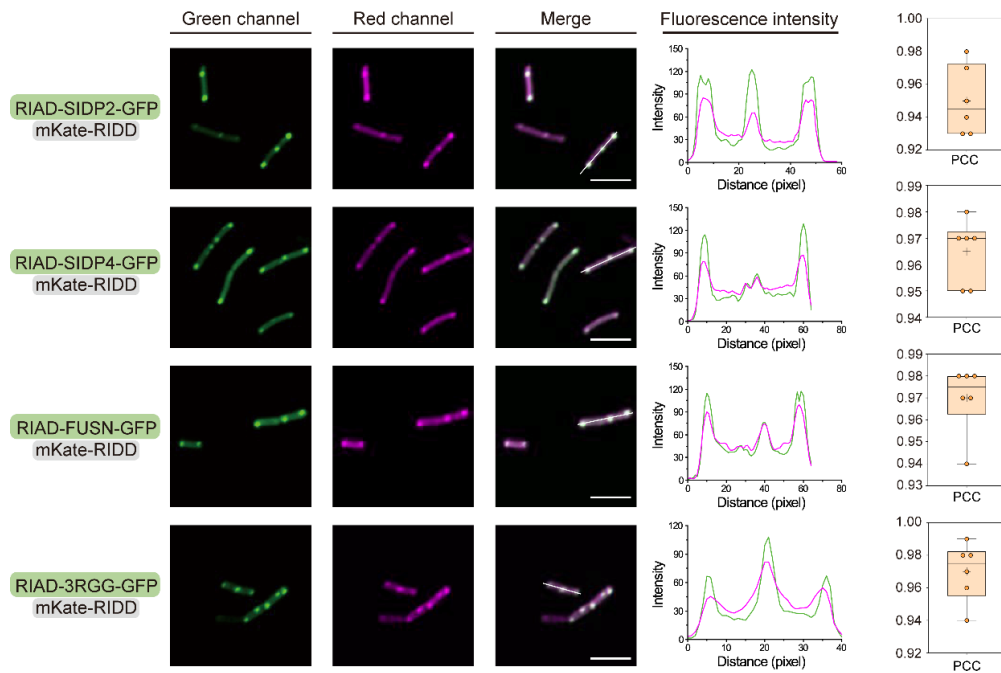

**Supplementary Fig. 27 Colocalization of multiple fluorescent proteins in compartments upon coexpression of mKate-RIDD and RIAD fused to SIDP2-GFP, SIDP4-GFP, FUSN-GFP, and 3RGG-GFP, respectively.** Representative images showed that all four fusion proteins can form cellular condensates within *B. subtilis* and can recruit target fluorescent protein. The box plots show the mean value as a black cross, the center as a black line, box extending between the 25<sup>th</sup> and 75<sup>th</sup> percentiles, and whiskers indicating minimum and maximum data points ( $n = 6$  biologically independent cells). Scale bars = 5  $\mu\text{m}$ . Source data provided as a Source Data file.

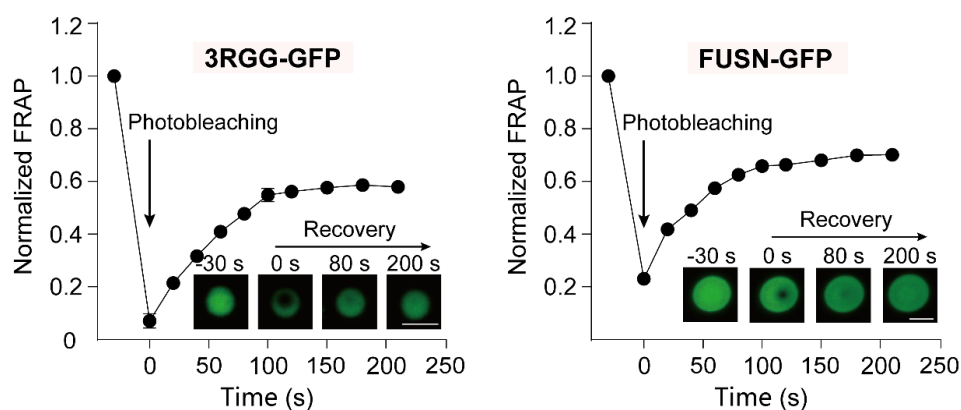

**Supplementary Fig. 28 Fluorescence recovery after photobleaching (FRAP) measurement of 3RGG-GFP and FUSN-GFP condensates *in vitro*.** FRAP recovery curves (top) and representative images (bottom) are shown ( $\sim 50 \mu\text{M}$  protein concentration, 150 mM NaCl, pH=7.4,  $\sim 25^\circ\text{C}$ , without PEG2000). Data are presented as mean  $\pm$  s.d. of three biologically independent replicates. Scale bars = 5  $\mu\text{m}$ . Source data provided as a Source Data

file.

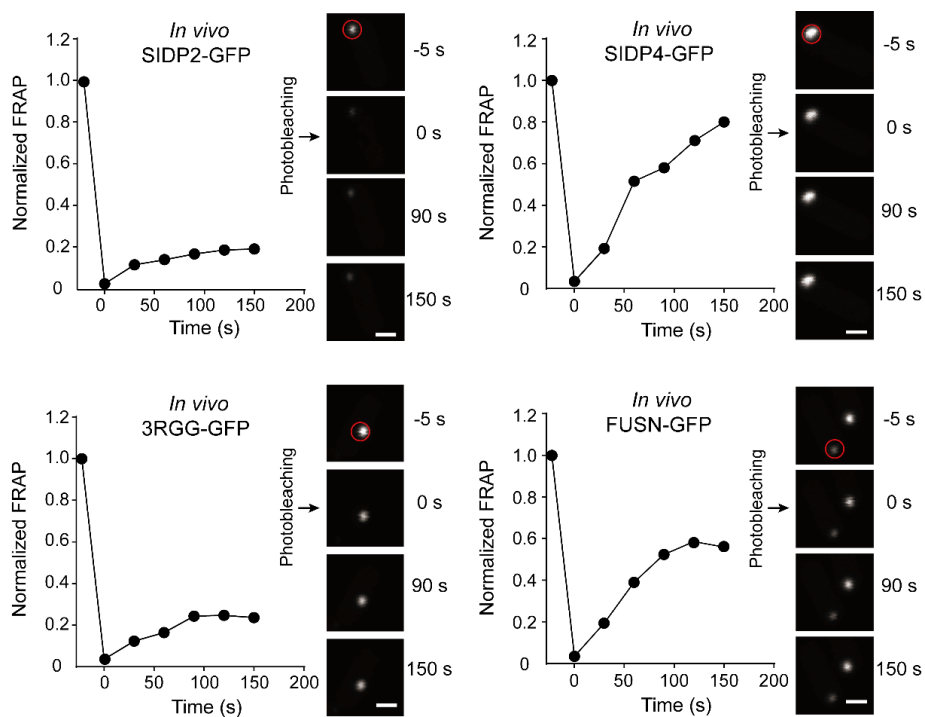

**Supplementary Fig. 29 Fluorescence recovery after photobleaching (FRAP) of SIDP2-GFP, SIDP4-GFP, 3RGG-GFP and FUSN-GFP in *B. subtilis*.** The red circle indicates the bleached area. Data are represented as mean  $\pm$  standard error from  $n=3$  biologically independent cells. Representative images shown alongside. Scale bars = 1  $\mu\text{m}$ . Source data provided as a Source Data file.

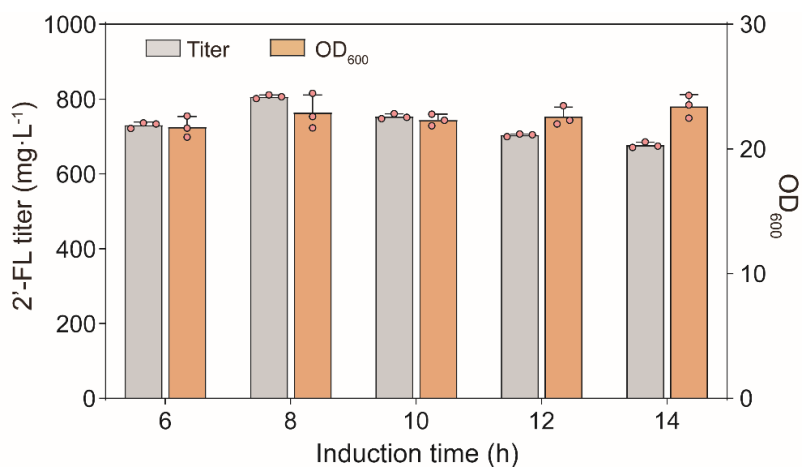

**Supplementary Fig. 30 Effects of induction time for cellular condensates formation on 2'-fucosyllactose (2'-FL) production.** Data are presented as mean  $\pm$  s.d. of three biologically independent replicates. Source data provided as a Source Data file.

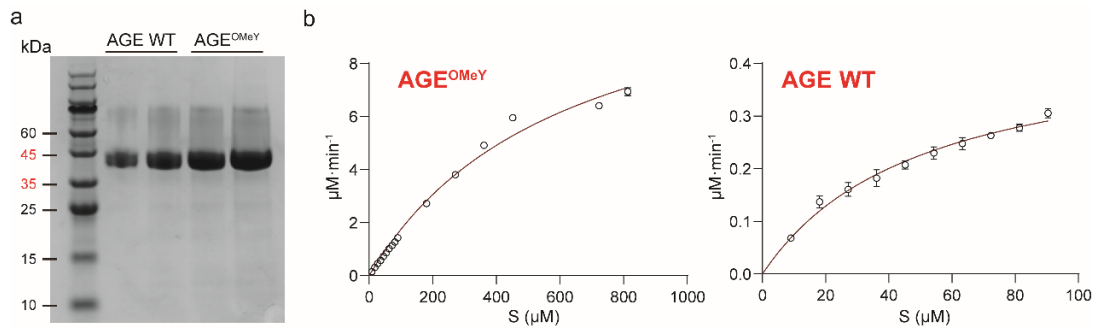

**Supplementary Fig. 31 In vitro assays of catalytic activity on GlcNAc substrate by AGE WT and its mutant AGE<sup>OMeY</sup>.** (a) SDS-PAGE analysis of the AGE wild type (WT) and its mutant AGE<sup>OMeY</sup>. (b) Nonlinear fitting for AGE WT and AGE<sup>OMeY</sup> kinetic constant measurements. Data are presented as mean  $\pm$  s.d. of three biologically independent replicates. Source data provided as a Source Data file.

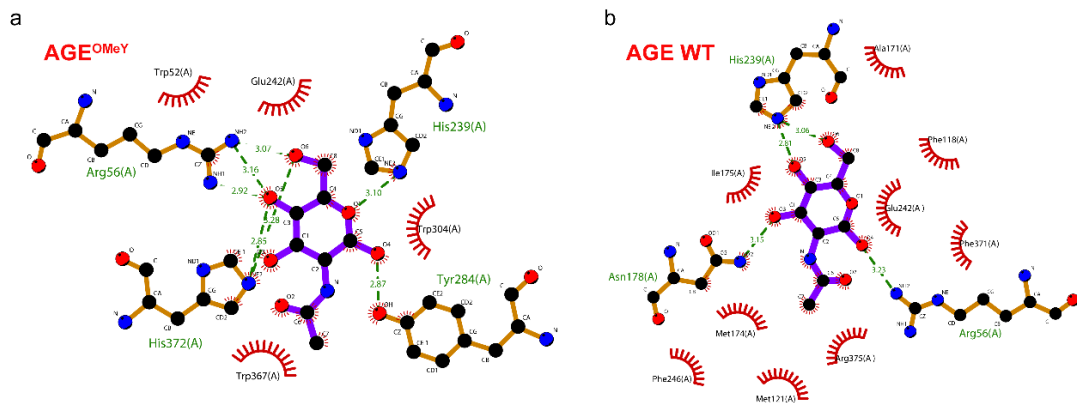

**Supplementary Fig. 32 Geometric constraints of enzyme-substrate interactions for catalytic activity with GlcNAc.** Schematic representation of the interactions between AGE<sup>OMeY</sup> (a) or AGE (b) and GlcNAc, based on Alphafold2 model structure. Hydrogen bonds are shown as dashed lines.

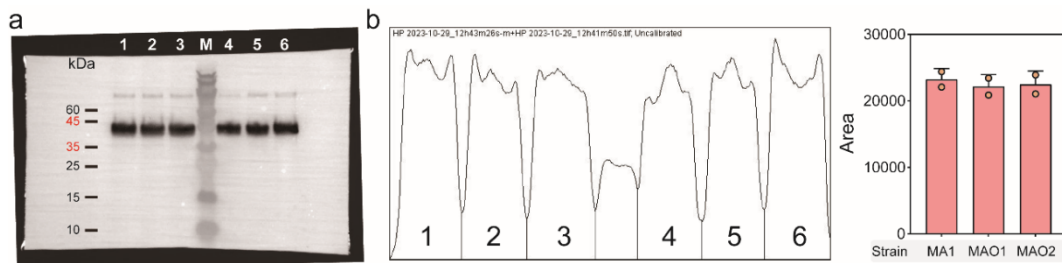

**Supplementary Fig. 33 Western blots of AGE and AGE<sup>OMeY</sup> from *B. subtilis* cell lysates.** (a) Lane 1 and 2, strain MA1 (AGE); lane 3 and 4, strain MAO1 (AGE<sup>OMeY</sup> with aaRS/tRNA<sub>OMeY</sub> system); lane 5 and 6, strain MAO2 (AGE<sup>OMeY</sup> with JDM1 system). lane M, protein molecular



weight marker. (b) Gray values of lane 1-6 by using ImageJ. Data are expressed as the mean  $\pm$  SD. Source data provided as a Source Data file.
